# Supplementary material for: De-Novo Learning of Genome-Scale Regulatory Networks in S. cerevisiae
Source: PLOS journal article supplement (doi:10.1371/journal.pone.0106479), 2014-09-12

**Figure S5:** Direct regulatory interactions between transcription factors in gold-standard gene regulatory network #3. Inhibiting edges are shown with red, and excitatory edges are shown with black.

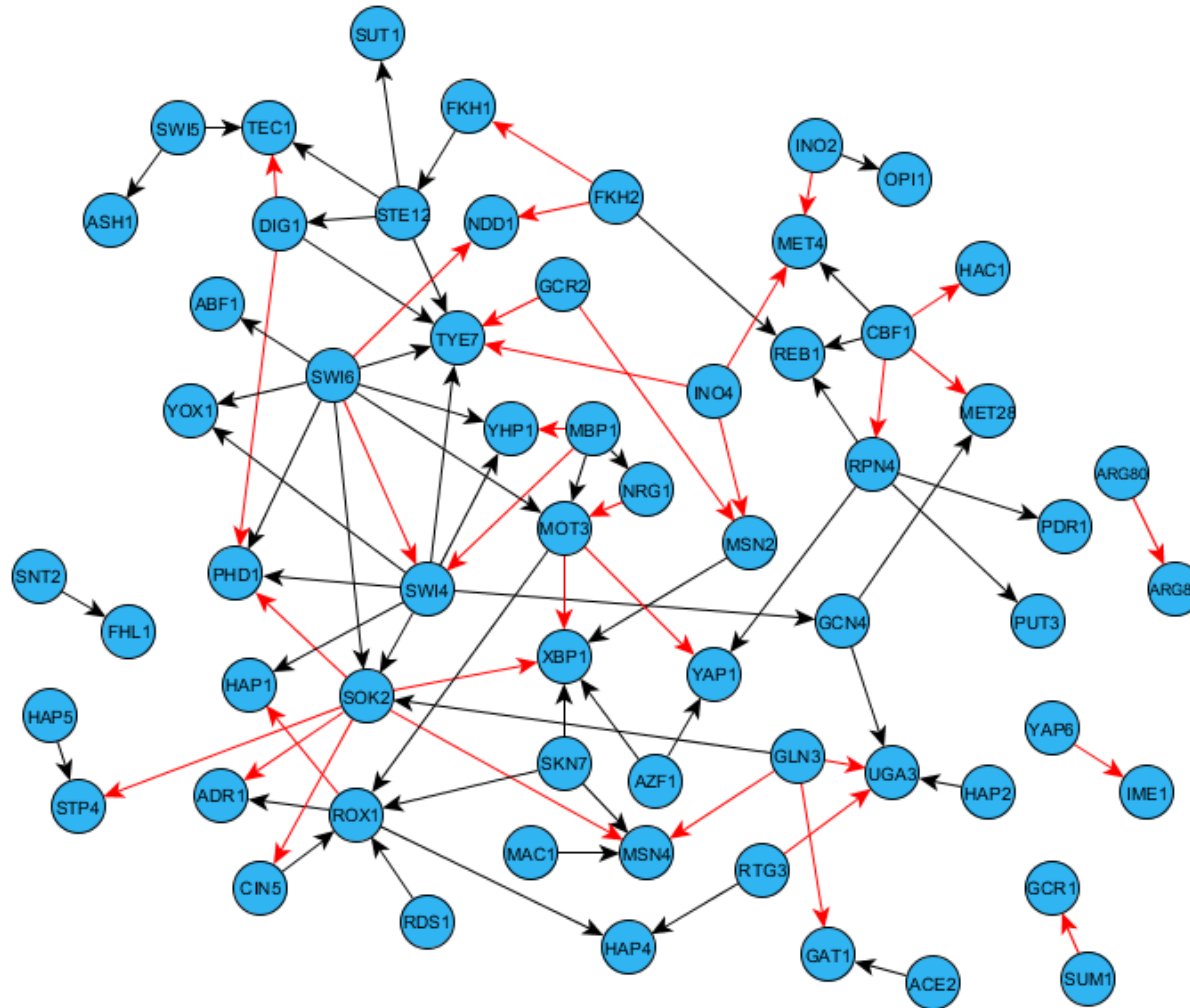

Supplement: S5 (10.1371/journal.pone.0106479.s005) [file journal.pone.0106479.s005]
