# Supplementary material for: De-Novo Learning of Genome-Scale Regulatory Networks in S. cerevisiae
Source: PLoS One. 2014 Sep 12;9(9):e106479. doi: 10.1371/journal.pone.0106479 (PMC4162580; doi:10.1371/journal.pone.0106479)
Supplement: Spreadsheet S1 — Regulatory Network. (XLSX) [file pone.0106479.s018.xlsx]

## Sheet: Regulatory_network
Gene	Regulatory target of this gene
YAL002W	SNR10
YAL009W	SNR10
YAL011W	SNR10
YAL021C	SNR10
YAL040C	SNR10
YBL003C	SNR10
YBL008W	SNR10
YBL016W	SNR10
YBL079W	SNR10
YBL103C	SNR10
YBR028C	SNR10
YBR030W	SNR10
YBR081C	SNR10
YBR095C	SNR10
YBR097W	SNR10
YBR112C	SNR10
YBR114W	SNR10
YBR140C	SNR10
YBR215W	SNR10
YBR231C	SNR10
YBR274W	SNR10
YBR278W	SNR10
YBR279W	SNR10
YBR285W	SNR10
YBR289W	SNR10
YCL011C	SNR10
YCL032W	SNR10
YCL037C	SNR10
YCR065W	SNR10
YCR077C	SNR10
YCR081W	SNR10
YCR084C	SNR10
YCR095C	SNR10
YDL002C	SNR10
YDL020C	SNR10
YDL047W	SNR10
YDL074C	SNR10
YDL090C	SNR10
YDL154W	SNR10
YDL160C	SNR10
YDL175C	SNR10
YDL188C	SNR10
YDL214C	SNR10
YDR028C	SNR10
YDR030C	SNR10
YDR049W	SNR10
YDR073W	SNR10
YDR074W	SNR10
YDR083W	SNR10
YDR096W	SNR10
YDR123C	SNR10
YDR137W	SNR10
YDR155C	SNR10
YDR156W	SNR10
YDR173C	SNR10
YDR174W	SNR10
YDR176W	SNR10
YDR213W	SNR10
YDR279W	SNR10
YDR283C	SNR10
YDR315C	SNR10
YDR320C	SNR10
YDR323C	SNR10
YDR332W	SNR10
YDR334W	SNR10
YDR359C	SNR10
YDR364C	SNR10
YDR375C	SNR10
YDR378C	SNR10
YDR392W	SNR10
YDR432W	SNR10
YDR448W	SNR10
YDR457W	SNR10
YDR463W	SNR10
YDR485C	SNR10
YDR495C	SNR10
YEL013W	SNR10
YEL044W	SNR10
YER016W	SNR10
YER040W	SNR10
YER068W	SNR10
YER092W	SNR10
YER111C	SNR10
YER139C	SNR10
YER164W	SNR10
YER169W	SNR10
YFL001W	SNR10
YFR014C	SNR10
YFR053C	SNR10
YGL019W	SNR10
YGL035C	SNR10
YGL058W	SNR10
YGL066W	SNR10
YGL070C	SNR10
YGL087C	SNR10
YGL090W	SNR10
YGL100W	SNR10
YGL127C	SNR10
YGL158W	SNR10
YGL168W	SNR10
YGL173C	SNR10
YGL175C	SNR10
YGL197W	SNR10
YGL244W	SNR10
YGL246C	SNR10
YGL252C	SNR10
YGL253W	SNR10
YGR040W	SNR10
YGR072W	SNR10
YGR081C	SNR10
YGR104C	SNR10
YGR108W	SNR10
YGR134W	SNR10
YGR157W	SNR10
YGR162W	SNR10
YGR180C	SNR10
YGR252W	SNR10
YHL002W	SNR10
YHL020C	SNR10
YHL025W	SNR10
YHR003C	SNR10
YHR030C	SNR10
YHR031C	SNR10
YHR032W	SNR10
YHR041C	SNR10
YHR066W	SNR10
YHR077C	SNR10
YHR081W	SNR10
YHR082C	SNR10
YHR084W	SNR10
YHR111W	SNR10
YHR167W	SNR10
YIL008W	SNR10
YIL009C-A	SNR10
YIL033C	SNR10
YIL036W	SNR10
YIL038C	SNR10
YIL040W	SNR10
YIL084C	SNR10
YIL112W	SNR10
YIL128W	SNR10
YIL133C	SNR10
YIL146C	SNR10
YJL095W	SNR10
YJL105W	SNR10
YJL124C	SNR10
YJL141C	SNR10
YJL149W	SNR10
YJL176C	SNR10
YJL204C	SNR10
YJR060W	SNR10
YJR073C	SNR10
YJR090C	SNR10
YJR102C	SNR10
YJR122W	SNR10
YJR140C	SNR10
YKL010C	SNR10
YKL057C	SNR10
YKL126W	SNR10
YKL139W	SNR10
YKL149C	SNR10
YKL160W	SNR10
YKL168C	SNR10
YKL198C	SNR10
YKR023W	SNR10
YKR057W	SNR10
YKR072C	SNR10
YKR082W	SNR10
YKR092C	SNR10
YLL002W	SNR10
YLR018C	SNR10
YLR021W	SNR10
YLR032W	SNR10
YLR039C	SNR10
YLR048W	SNR10
YLR055C	SNR10
YLR085C	SNR10
YLR148W	SNR10
YLR216C	SNR10
YLR226W	SNR10
YLR248W	SNR10
YLR262C	SNR10
YLR320W	SNR10
YLR325C	SNR10
YLR362W	SNR10
YLR403W	SNR10
YLR418C	SNR10
YLR438W	SNR10
YML001W	SNR10
YML036W	SNR10
YML041C	SNR10
YML062C	SNR10
YML121W	SNR10
YML124C	SNR10
YMR014W	SNR10
YMR031C	SNR10
YMR091C	SNR10
YMR127C	SNR10
YMR202W	SNR10
YMR216C	SNR10
YMR231W	SNR10
YMR312W	SNR10
YNL020C	SNR10
YNL022C	SNR10
YNL053W	SNR10
YNL056W	SNR10
YNL068C	SNR10
YNL076W	SNR10
YNL097C	SNR10
YNL106C	SNR10
YNL107W	SNR10
YNL138W	SNR10
YNL147W	SNR10
YNL154C	SNR10
YNL183C	SNR10
YNL186W	SNR10
YNL213C	SNR10
YNL215W	SNR10
YNL227C	SNR10
YNL248C	SNR10
YNL278W	SNR10
YNL330C	SNR10
YNR006W	SNR10
YNR024W	SNR10
YOL012C	SNR10
YOL045W	SNR10
YOL051W	SNR10
YOL072W	SNR10
YOL081W	SNR10
YOL090W	SNR10
YOL093W	SNR10
YOL108C	SNR10
YOL115W	SNR10
YOL136C	SNR10
YOL138C	SNR10
YOL145C	SNR10
YOL148C	SNR10
YOR001W	SNR10
YOR038C	SNR10
YOR039W	SNR10
YOR061W	SNR10
YOR140W	SNR10
YOR141C	SNR10
YOR179C	SNR10
YOR189W	SNR10
YOR231W	SNR10
YOR267C	SNR10
YOR295W	SNR10
YOR338W	SNR10
YOR360C	SNR10
YOR371C	SNR10
YPL002C	SNR10
YPL022W	SNR10
YPL045W	SNR10
YPL049C	SNR10
YPL055C	SNR10
YPL072W	SNR10
YPL101W	SNR10
YPL120W	SNR10
YPL150W	SNR10
YPL180W	SNR10
YPL184C	SNR10
YPL193W	SNR10
YPL199C	SNR10
YPL212C	SNR10
YPL254W	SNR10
YPL260W	SNR10
YPL268W	SNR10
YPL273W	SNR10
YPR106W	SNR10
YPR125W	SNR10
YPR160W	SNR10
YPR179C	SNR10
YAL002W	YAL001C
YAL013W	YAL001C
YAL040C	YAL001C
YBL006C	YAL001C
YBL007C	YAL001C
YBL016W	YAL001C
YBR028C	YAL001C
YBR062C	YAL001C
YBR065C	YAL001C
YBR095C	YAL001C
YBR097W	YAL001C
YBR112C	YAL001C
YBR140C	YAL001C
YBR279W	YAL001C
YBR285W	YAL001C
YCL016C	YAL001C
YCL037C	YAL001C
YCR020W-B	YAL001C
YCR053W	YAL001C
YCR065W	YAL001C
YCR081W	YAL001C
YDL006W	YAL001C
YDL035C	YAL001C
YDL090C	YAL001C
YDL160C	YAL001C
YDR028C	YAL001C
YDR069C	YAL001C
YDR074W	YAL001C
YDR083W	YAL001C
YDR101C	YAL001C
YDR137W	YAL001C
YDR143C	YAL001C
YDR159W	YAL001C
YDR176W	YAL001C
YDR227W	YAL001C
YDR254W	YAL001C
YDR315C	YAL001C
YDR318W	YAL001C
YDR320C	YAL001C
YDR332W	YAL001C
YDR359C	YAL001C
YDR392W	YAL001C
YDR448W	YAL001C
YDR463W	YAL001C
YDR496C	YAL001C
YEL013W	YAL001C
YEL018W	YAL001C
YEL044W	YAL001C
YEL061C	YAL001C
YER040W	YAL001C
YER068W	YAL001C
YER111C	YAL001C
YER116C	YAL001C
YER151C	YAL001C
YFR001W	YAL001C
YFR040W	YAL001C
YGL029W	YAL001C
YGL035C	YAL001C
YGL070C	YAL001C
YGL100W	YAL001C
YGL131C	YAL001C
YGL133W	YAL001C
YGL173C	YAL001C
YGL174W	YAL001C
YGL197W	YAL001C
YGL244W	YAL001C
YGL246C	YAL001C
YGL251C	YAL001C
YGR072W	YAL001C
YGR081C	YAL001C
YGR104C	YAL001C
YGR133W	YAL001C
YGR180C	YAL001C
YGR184C	YAL001C
YGR208W	YAL001C
YGR252W	YAL001C
YGR270W	YAL001C
YHL002W	YAL001C
YHL025W	YAL001C
YHL034C	YAL001C
YHR003C	YAL001C
YHR066W	YAL001C
YHR077C	YAL001C
YHR079C	YAL001C
YHR115C	YAL001C
YIL009C-A	YAL001C
YIL033C	YAL001C
YIL036W	YAL001C
YIL084C	YAL001C
YIL112W	YAL001C
YIL128W	YAL001C
YIR005W	YAL001C
YIR023W	YAL001C
YJL105W	YAL001C
YJL124C	YAL001C
YJL157C	YAL001C
YJL168C	YAL001C
YJL176C	YAL001C
YJL204C	YAL001C
YJR060W	YAL001C
YJR090C	YAL001C
YJR102C	YAL001C
YJR122W	YAL001C
YJR135C	YAL001C
YKL002W	YAL001C
YKL011C	YAL001C
YKL054C	YAL001C
YKL074C	YAL001C
YKL126W	YAL001C
YKL139W	YAL001C
YKR001C	YAL001C
YKR023W	YAL001C
YKR057W	YAL001C
YKR060W	YAL001C
YKR072C	YAL001C
YKR082W	YAL001C
YLL002W	YAL001C
YLR024C	YAL001C
YLR025W	YAL001C
YLR052W	YAL001C
YLR192C	YAL001C
YLR226W	YAL001C
YLR262C	YAL001C
YLR304C	YAL001C
YLR342W	YAL001C
YLR357W	YAL001C
YLR375W	YAL001C
YLR381W	YAL001C
YLR384C	YAL001C
YLR403W	YAL001C
YLR417W	YAL001C
YLR421C	YAL001C
YLR427W	YAL001C
YLR442C	YAL001C
YML016C	YAL001C
YML100W	YAL001C
YML102W	YAL001C
YML121W	YAL001C
YML124C	YAL001C
YMR048W	YAL001C
YMR075W	YAL001C
YMR080C	YAL001C
YMR091C	YAL001C
YMR116C	YAL001C
YMR224C	YAL001C
YMR263W	YAL001C
YMR294W	YAL001C
YNL025C	YAL001C
YNL068C	YAL001C
YNL097C	YAL001C
YNL106C	YAL001C
YNL107W	YAL001C
YNL119W	YAL001C
YNL136W	YAL001C
YNL138W	YAL001C
YNL154C	YAL001C
YNL186W	YAL001C
YNL199C	YAL001C
YNL213C	YAL001C
YNL241C	YAL001C
YNL257C	YAL001C
YNL307C	YAL001C
YNR004W	YAL001C
YNR006W	YAL001C
YNR023W	YAL001C
YNR051C	YAL001C
YOL006C	YAL001C
YOL051W	YAL001C
YOL072W	YAL001C
YOL081W	YAL001C
YOL093W	YAL001C
YOL108C	YAL001C
YOL115W	YAL001C
YOL136C	YAL001C
YOL145C	YAL001C
YOL148C	YAL001C
YOR141C	YAL001C
YOR205C	YAL001C
YOR258W	YAL001C
YOR290C	YAL001C
YOR295W	YAL001C
YOR371C	YAL001C
YPL002C	YAL001C
YPL018W	YAL001C
YPL022W	YAL001C
YPL031C	YAL001C
YPL042C	YAL001C
YPL047W	YAL001C
YPL049C	YAL001C
YPL065W	YAL001C
YPL101W	YAL001C
YPL123C	YAL001C
YPL125W	YAL001C
YPL157W	YAL001C
YPL180W	YAL001C
YPL181W	YAL001C
YPL184C	YAL001C
YPL193W	YAL001C
YPL213W	YAL001C
YPL254W	YAL001C
YPL268W	YAL001C
YPR018W	YAL001C
YPR023C	YAL001C
YPR046W	YAL001C
YPR057W	YAL001C
YPR101W	YAL001C
YPR119W	YAL001C
YPR135W	YAL001C
YPR152C	YAL001C
YPR173C	YAL001C
YPR189W	YAL001C
YAL013W	YAL002W
YAL021C	YAL002W
YAR003W	YAL002W
YBL016W	YAL002W
YBL079W	YAL002W
YBR009C	YAL002W
YBR081C	YAL002W
YBR095C	YAL002W
YBR097W	YAL002W
YBR112C	YAL002W
YBR114W	YAL002W
YBR175W	YAL002W
YBR279W	YAL002W
YBR289W	YAL002W
YCL037C	YAL002W
YCR081W	YAL002W
YCR084C	YAL002W
YDL076C	YAL002W
YDL090C	YAL002W
YDL160C	YAL002W
YDR028C	YAL002W
YDR074W	YAL002W
YDR079C-A	YAL002W
YDR143C	YAL002W
YDR159W	YAL002W
YDR174W	YAL002W
YDR176W	YAL002W
YDR315C	YAL002W
YDR320C	YAL002W
YDR359C	YAL002W
YDR448W	YAL002W
YDR463W	YAL002W
YEL018W	YAL002W
YER139C	YAL002W
YER151C	YAL002W
YER161C	YAL002W
YER169W	YAL002W
YER177W	YAL002W
YGL019W	YAL002W
YGL070C	YAL002W
YGL173C	YAL002W
YGL194C	YAL002W
YGL246C	YAL002W
YGR056W	YAL002W
YGR063C	YAL002W
YGR072W	YAL002W
YGR157W	YAL002W
YGR240C	YAL002W
YGR252W	YAL002W
YGR288W	YAL002W
YHL002W	YAL002W
YHL020C	YAL002W
YHR077C	YAL002W
YHR079C	YAL002W
YHR115C	YAL002W
YHR119W	YAL002W
YHR178W	YAL002W
YHR187W	YAL002W
YIL008W	YAL002W
YIL033C	YAL002W
YIL036W	YAL002W
YIL084C	YAL002W
YIL133C	YAL002W
YIR023W	YAL002W
YIR026C	YAL002W
YJL056C	YAL002W
YJL168C	YAL002W
YJL176C	YAL002W
YJL204C	YAL002W
YJR073C	YAL002W
YJR090C	YAL002W
YJR102C	YAL002W
YJR122W	YAL002W
YJR127C	YAL002W
YKL002W	YAL002W
YKL009W	YAL002W
YKL011C	YAL002W
YKL139W	YAL002W
YKL160W	YAL002W
YKR001C	YAL002W
YKR023W	YAL002W
YKR072C	YAL002W
YKR082W	YAL002W
YKR092C	YAL002W
YLR032W	YAL002W
YLR048W	YAL002W
YLR074C	YAL002W
YLR085C	YAL002W
YLR148W	YAL002W
YLR226W	YAL002W
YLR262C	YAL002W
YLR325C	YAL002W
YLR357W	YAL002W
YLR403W	YAL002W
YLR418C	YAL002W
YLR421C	YAL002W
YML100W	YAL002W
YML102W	YAL002W
YMR075W	YAL002W
YMR080C	YAL002W
YMR091C	YAL002W
YMR179W	YAL002W
YMR205C	YAL002W
YMR231W	YAL002W
YMR263W	YAL002W
YMR269W	YAL002W
YMR312W	YAL002W
YNL022C	YAL002W
YNL068C	YAL002W
YNL097C	YAL002W
YNL107W	YAL002W
YNL136W	YAL002W
YNL138W	YAL002W
YNL154C	YAL002W
YNL199C	YAL002W
YNL248C	YAL002W
YNL330C	YAL002W
YNR023W	YAL002W
YOL004W	YAL002W
YOL041C	YAL002W
YOL051W	YAL002W
YOL072W	YAL002W
YOL081W	YAL002W
YOL108C	YAL002W
YOL136C	YAL002W
YOL145C	YAL002W
YOL148C	YAL002W
YOR001W	YAL002W
YOR039W	YAL002W
YOR123C	YAL002W
YOR205C	YAL002W
YPL022W	YAL002W
YPL031C	YAL002W
YPL042C	YAL002W
YPL049C	YAL002W
YPL101W	YAL002W
YPL123C	YAL002W
YPL193W	YAL002W
YPL212C	YAL002W
YPL268W	YAL002W
YPL274W	YAL002W
YPR018W	YAL002W
YPR023C	YAL002W
YPR179C	YAL002W
YAL002W	YAL003W
YBL003C	YAL003W
YBL016W	YAL003W
YBL019W	YAL003W
YBL054W	YAL003W
YBR081C	YAL003W
YBR112C	YAL003W
YBR231C	YAL003W
YBR279W	YAL003W
YBR285W	YAL003W
YBR289W	YAL003W
YCL037C	YAL003W
YCR081W	YAL003W
YCR084C	YAL003W
YDL002C	YAL003W
YDL006W	YAL003W
YDL035C	YAL003W
YDL047W	YAL003W
YDL076C	YAL003W
YDL090C	YAL003W
YDL160C	YAL003W
YDL171C	YAL003W
YDL197C	YAL003W
YDL236W	YAL003W
YDR028C	YAL003W
YDR043C	YAL003W
YDR069C	YAL003W
YDR080W	YAL003W
YDR123C	YAL003W
YDR159W	YAL003W
YDR176W	YAL003W
YDR219C	YAL003W
YDR244W	YAL003W
YDR295C	YAL003W
YDR315C	YAL003W
YDR320C	YAL003W
YDR332W	YAL003W
YDR448W	YAL003W
YDR463W	YAL003W
YDR485C	YAL003W
YEL015W	YAL003W
YEL044W	YAL003W
YER020W	YAL003W
YER068W	YAL003W
YER116C	YAL003W
YER132C	YAL003W
YER164W	YAL003W
YGL016W	YAL003W
YGL058W	YAL003W
YGL070C	YAL003W
YGL173C	YAL003W
YGL174W	YAL003W
YGL197W	YAL003W
YGL244W	YAL003W
YGL251C	YAL003W
YGR056W	YAL003W
YGR135W	YAL003W
YGR162W	YAL003W
YGR200C	YAL003W
YGR252W	YAL003W
YGR270W	YAL003W
YHL002W	YAL003W
YHL020C	YAL003W
YHL025W	YAL003W
YHR003C	YAL003W
YHR031C	YAL003W
YHR034C	YAL003W
YHR041C	YAL003W
YHR079C	YAL003W
YHR120W	YAL003W
YHR178W	YAL003W
YIL040W	YAL003W
YIL112W	YAL003W
YIL128W	YAL003W
YIR005W	YAL003W
YIR026C	YAL003W
YJL176C	YAL003W
YJL204C	YAL003W
YJR060W	YAL003W
YJR090C	YAL003W
YJR122W	YAL003W
YKL002W	YAL003W
YKL011C	YAL003W
YKL032C	YAL003W
YKL054C	YAL003W
YKL126W	YAL003W
YKL139W	YAL003W
YKL143W	YAL003W
YKL149C	YAL003W
YKR072C	YAL003W
YKR099W	YAL003W
YLL002W	YAL003W
YLR024C	YAL003W
YLR025W	YAL003W
YLR085C	YAL003W
YLR304C	YAL003W
YLR357W	YAL003W
YLR368W	YAL003W
YLR403W	YAL003W
YLR418C	YAL003W
YML100W	YAL003W
YMR091C	YAL003W
YMR116C	YAL003W
YMR216C	YAL003W
YMR273C	YAL003W
YMR287C	YAL003W
YMR294W	YAL003W
YNL021W	YAL003W
YNL025C	YAL003W
YNL072W	YAL003W
YNL107W	YAL003W
YNL138W	YAL003W
YNL186W	YAL003W
YNL213C	YAL003W
YNL215W	YAL003W
YNR010W	YAL003W
YNR023W	YAL003W
YOL051W	YAL003W
YOL081W	YAL003W
YOL093W	YAL003W
YOL108C	YAL003W
YOL136C	YAL003W
YOL145C	YAL003W
YOL148C	YAL003W
YOR023C	YAL003W
YOR205C	YAL003W
YOR290C	YAL003W
YOR295W	YAL003W
YPL042C	YAL003W
YPL045W	YAL003W
YPL055C	YAL003W
YPL165C	YAL003W
YPL193W	YAL003W
YPL254W	YAL003W
YPR057W	YAL003W
YPR065W	YAL003W
YPR070W	YAL003W
YPR101W	YAL003W
YPR120C	YAL003W
YPR125W	YAL003W
YPR152C	YAL003W
YBL016W	YAL005C
YBL021C	YAL005C
YBL079W	YAL005C
YBR081C	YAL005C
YBR112C	YAL005C
YBR285W	YAL005C
YCL037C	YAL005C
YCR053W	YAL005C
YDL020C	YAL005C
YDL047W	YAL005C
YDR028C	YAL005C
YDR079C-A	YAL005C
YDR123C	YAL005C
YDR137W	YAL005C
YDR173C	YAL005C
YDR176W	YAL005C
YDR318W	YAL005C
YDR332W	YAL005C
YDR364C	YAL005C
YDR378C	YAL005C
YDR392W	YAL005C
YDR432W	YAL005C
YDR463W	YAL005C
YDR496C	YAL005C
YER111C	YAL005C
YER167W	YAL005C
YFL001W	YAL005C
YGL043W	YAL005C
YGL078C	YAL005C
YGL100W	YAL005C
YGL168W	YAL005C
YGL197W	YAL005C
YGL244W	YAL005C
YGR097W	YAL005C
YGR135W	YAL005C
YGR157W	YAL005C
YGR208W	YAL005C
YGR270W	YAL005C
YHL020C	YAL005C
YHR034C	YAL005C
YHR079C	YAL005C
YHR111W	YAL005C
YHR178W	YAL005C
YIL009C-A	YAL005C
YIL036W	YAL005C
YIL040W	YAL005C
YIL122W	YAL005C
YIL130W	YAL005C
YIR005W	YAL005C
YIR026C	YAL005C
YIR033W	YAL005C
YJL115W	YAL005C
YJL176C	YAL005C
YJL206C	YAL005C
YJR060W	YAL005C
YJR063W	YAL005C
YJR073C	YAL005C
YJR090C	YAL005C
YKL009W	YAL005C
YKL011C	YAL005C
YKL057C	YAL005C
YKL149C	YAL005C
YKL212W	YAL005C
YKR072C	YAL005C
YKR082W	YAL005C
YLL002W	YAL005C
YLR015W	YAL005C
YLR048W	YAL005C
YLR131C	YAL005C
YLR192C	YAL005C
YLR226W	YAL005C
YLR234W	YAL005C
YLR262C	YAL005C
YLR304C	YAL005C
YLR357W	YAL005C
YLR401C	YAL005C
YLR438W	YAL005C
YLR451W	YAL005C
YML001W	YAL005C
YML016C	YAL005C
YML102W	YAL005C
YMR042W	YAL005C
YMR091C	YAL005C
YMR116C	YAL005C
YMR179W	YAL005C
YMR186W	YAL005C
YMR234W	YAL005C
YMR258C	YAL005C
YMR294W	YAL005C
YNL199C	YAL005C
YNL213C	YAL005C
YNL215W	YAL005C
YNL248C	YAL005C
YNL250W	YAL005C
YOL051W	YAL005C
YOL072W	YAL005C
YOL090W	YAL005C
YOL093W	YAL005C
YOL108C	YAL005C
YOL145C	YAL005C
YOL148C	YAL005C
YOR007C	YAL005C
YOR027W	YAL005C
YOR033C	YAL005C
YOR113W	YAL005C
YOR205C	YAL005C
YOR258W	YAL005C
YOR295W	YAL005C
YPL042C	YAL005C
YPL101W	YAL005C
YPL123C	YAL005C
YPL193W	YAL005C
YPL226W	YAL005C
YPL254W	YAL005C
YPR018W	YAL005C
YPR057W	YAL005C
YPR101W	YAL005C
YPR141C	YAL005C
YPR173C	YAL005C
YAL013W	YAL007C
YAL027W	YAL007C
YBL003C	YAL007C
YBL006C	YAL007C
YBL039C	YAL007C
YBR030W	YAL007C
YBR081C	YAL007C
YBR097W	YAL007C
YBR107C	YAL007C
YBR140C	YAL007C
YBR279W	YAL007C
YCL016C	YAL007C
YCL037C	YAL007C
YCR077C	YAL007C
YDL020C	YAL007C
YDL047W	YAL007C
YDL056W	YAL007C
YDL074C	YAL007C
YDL076C	YAL007C
YDL090C	YAL007C
YDL154W	YAL007C
YDR005C	YAL007C
YDR028C	YAL007C
YDR030C	YAL007C
YDR079C-A	YAL007C
YDR101C	YAL007C
YDR121W	YAL007C
YDR123C	YAL007C
YDR156W	YAL007C
YDR159W	YAL007C
YDR206W	YAL007C
YDR323C	YAL007C
YDR332W	YAL007C
YDR359C	YAL007C
YDR364C	YAL007C
YDR378C	YAL007C
YDR443C	YAL007C
YDR463W	YAL007C
YEL043W	YAL007C
YEL044W	YAL007C
YER007C-A	YAL007C
YER040W	YAL007C
YER068W	YAL007C
YER111C	YAL007C
YER116C	YAL007C
YER139C	YAL007C
YER151C	YAL007C
YGL019W	YAL007C
YGL058W	YAL007C
YGL070C	YAL007C
YGL078C	YAL007C
YGL090W	YAL007C
YGL094C	YAL007C
YGL168W	YAL007C
YGL173C	YAL007C
YGL192W	YAL007C
YGL244W	YAL007C
YGL246C	YAL007C
YGL252C	YAL007C
YGR071C	YAL007C
YGR072W	YAL007C
YGR089W	YAL007C
YGR097W	YAL007C
YGR157W	YAL007C
YGR162W	YAL007C
YGR180C	YAL007C
YGR212W	YAL007C
YHL020C	YAL007C
YHL034C	YAL007C
YHR031C	YAL007C
YHR034C	YAL007C
YHR077C	YAL007C
YHR081W	YAL007C
YHR120W	YAL007C
YHR121W	YAL007C
YHR178W	YAL007C
YHR191C	YAL007C
YIL008W	YAL007C
YIL009C-A	YAL007C
YIL033C	YAL007C
YIL084C	YAL007C
YIL133C	YAL007C
YIR023W	YAL007C
YIR026C	YAL007C
YIR033W	YAL007C
YJL056C	YAL007C
YJL115W	YAL007C
YJL124C	YAL007C
YJL176C	YAL007C
YJR073C	YAL007C
YJR090C	YAL007C
YKL002W	YAL007C
YKL009W	YAL007C
YKL054C	YAL007C
YKL057C	YAL007C
YKL068W	YAL007C
YKL074C	YAL007C
YKL110C	YAL007C
YKL113C	YAL007C
YKL139W	YAL007C
YKL160W	YAL007C
YKL185W	YAL007C
YKL206C	YAL007C
YKR001C	YAL007C
YKR029C	YAL007C
YKR057W	YAL007C
YKR092C	YAL007C
YLL002W	YAL007C
YLR048W	YAL007C
YLR074C	YAL007C
YLR182W	YAL007C
YLR192C	YAL007C
YLR226W	YAL007C
YLR320W	YAL007C
YLR325C	YAL007C
YLR342W	YAL007C
YLR403W	YAL007C
YLR418C	YAL007C
YML082W	YAL007C
YML097C	YAL007C
YML103C	YAL007C
YMR031C	YAL007C
YMR072W	YAL007C
YMR078C	YAL007C
YMR080C	YAL007C
YMR116C	YAL007C
YMR269W	YAL007C
YMR312W	YAL007C
YNL022C	YAL007C
YNL068C	YAL007C
YNL072W	YAL007C
YNL106C	YAL007C
YNL147W	YAL007C
YNL167C	YAL007C
YNL199C	YAL007C
YNL248C	YAL007C
YNL278W	YAL007C
YNL288W	YAL007C
YNR023W	YAL007C
YOL006C	YAL007C
YOL041C	YAL007C
YOL090W	YAL007C
YOL093W	YAL007C
YOL108C	YAL007C
YOL136C	YAL007C
YOL145C	YAL007C
YOL148C	YAL007C
YOR001W	YAL007C
YOR039W	YAL007C
YOR061W	YAL007C
YOR123C	YAL007C
YOR141C	YAL007C
YOR205C	YAL007C
YOR290C	YAL007C
YOR338W	YAL007C
YPL042C	YAL007C
YPL049C	YAL007C
YPL055C	YAL007C
YPL101W	YAL007C
YPL123C	YAL007C
YPL125W	YAL007C
YPL127C	YAL007C
YPL181W	YAL007C
YPL193W	YAL007C
YPL199C	YAL007C
YPL213W	YAL007C
YPL254W	YAL007C
YPR018W	YAL007C
YPR101W	YAL007C
YPR120C	YAL007C
YPR135W	YAL007C
YPR164W	YAL007C
YPR179C	YAL007C
YAL002W	YAL008W
YAL009W	YAL008W
YAL011W	YAL008W
YAL013W	YAL008W
YAL021C	YAL008W
YAL040C	YAL008W
YAL056W	YAL008W
YAR003W	YAL008W
YBL007C	YAL008W
YBL021C	YAL008W
YBL051C	YAL008W
YBL052C	YAL008W
YBL080C	YAL008W
YBR001C	YAL008W
YBR030W	YAL008W
YBR057C	YAL008W
YBR082C	YAL008W
YBR095C	YAL008W
YBR097W	YAL008W
YBR107C	YAL008W
YBR112C	YAL008W
YBR140C	YAL008W
YBR175W	YAL008W
YBR231C	YAL008W
YBR273C	YAL008W
YBR274W	YAL008W
YBR279W	YAL008W
YBR285W	YAL008W
YBR289W	YAL008W
YCL016C	YAL008W
YCL037C	YAL008W
YCL061C	YAL008W
YCR020W-B	YAL008W
YCR053W	YAL008W
YCR066W	YAL008W
YCR077C	YAL008W
YCR081W	YAL008W
YCR084C	YAL008W
YCR086W	YAL008W
YDL002C	YAL008W
YDL005C	YAL008W
YDL006W	YAL008W
YDL013W	YAL008W
YDL035C	YAL008W
YDL047W	YAL008W
YDL056W	YAL008W
YDL076C	YAL008W
YDL090C	YAL008W
YDL154W	YAL008W
YDL167C	YAL008W
YDR004W	YAL008W
YDR028C	YAL008W
YDR049W	YAL008W
YDR069C	YAL008W
YDR074W	YAL008W
YDR079C-A	YAL008W
YDR080W	YAL008W
YDR101C	YAL008W
YDR123C	YAL008W
YDR137W	YAL008W
YDR173C	YAL008W
YDR174W	YAL008W
YDR181C	YAL008W
YDR260C	YAL008W
YDR295C	YAL008W
YDR310C	YAL008W
YDR315C	YAL008W
YDR320C	YAL008W
YDR323C	YAL008W
YDR332W	YAL008W
YDR334W	YAL008W
YDR335W	YAL008W
YDR359C	YAL008W
YDR363W	YAL008W
YDR364C	YAL008W
YDR378C	YAL008W
YDR392W	YAL008W
YDR432W	YAL008W
YDR443C	YAL008W
YDR448W	YAL008W
YDR463W	YAL008W
YDR469W	YAL008W
YDR485C	YAL008W
YDR495C	YAL008W
YDR496C	YAL008W
YDR520C	YAL008W
YEL013W	YAL008W
YEL044W	YAL008W
YEL061C	YAL008W
YER016W	YAL008W
YER020W	YAL008W
YER030W	YAL008W
YER040W	YAL008W
YER068W	YAL008W
YER092W	YAL008W
YER110C	YAL008W
YER111C	YAL008W
YER116C	YAL008W
YER151C	YAL008W
YER167W	YAL008W
YER169W	YAL008W
YFR019W	YAL008W
YFR036W	YAL008W
YGL025C	YAL008W
YGL029W	YAL008W
YGL035C	YAL008W
YGL060W	YAL008W
YGL066W	YAL008W
YGL070C	YAL008W
YGL078C	YAL008W
YGL090W	YAL008W
YGL163C	YAL008W
YGL168W	YAL008W
YGL173C	YAL008W
YGL194C	YAL008W
YGL197W	YAL008W
YGL211W	YAL008W
YGL222C	YAL008W
YGL244W	YAL008W
YGL253W	YAL008W
YGR044C	YAL008W
YGR056W	YAL008W
YGR081C	YAL008W
YGR097W	YAL008W
YGR108W	YAL008W
YGR135W	YAL008W
YGR157W	YAL008W
YGR162W	YAL008W
YGR180C	YAL008W
YGR184C	YAL008W
YGR200C	YAL008W
YGR208W	YAL008W
YGR240C	YAL008W
YGR270W	YAL008W
YHL002W	YAL008W
YHL020C	YAL008W
YHL025W	YAL008W
YHL029C	YAL008W
YHR003C	YAL008W
YHR066W	YAL008W
YHR077C	YAL008W
YHR119W	YAL008W
YHR121W	YAL008W
YHR134W	YAL008W
YHR154W	YAL008W
YHR178W	YAL008W
YHR187W	YAL008W
YHR191C	YAL008W
YHR200W	YAL008W
YIL009C-A	YAL008W
YIL017C	YAL008W
YIL033C	YAL008W
YIL036W	YAL008W
YIL038C	YAL008W
YIL040W	YAL008W
YIL084C	YAL008W
YIL128W	YAL008W
YIL146C	YAL008W
YIR023W	YAL008W
YIR026C	YAL008W
YIR033W	YAL008W
YJL056C	YAL008W
YJL105W	YAL008W
YJL115W	YAL008W
YJL124C	YAL008W
YJL168C	YAL008W
YJL176C	YAL008W
YJL204C	YAL008W
YJL206C	YAL008W
YJR060W	YAL008W
YJR073C	YAL008W
YJR082C	YAL008W
YJR090C	YAL008W
YJR102C	YAL008W
YJR122W	YAL008W
YKL002W	YAL008W
YKL009W	YAL008W
YKL010C	YAL008W
YKL011C	YAL008W
YKL032C	YAL008W
YKL048C	YAL008W
YKL054C	YAL008W
YKL113C	YAL008W
YKL126W	YAL008W
YKL139W	YAL008W
YKL143W	YAL008W
YKL160W	YAL008W
YKL185W	YAL008W
YKL206C	YAL008W
YKR001C	YAL008W
YKR023W	YAL008W
YKR060W	YAL008W
YKR072C	YAL008W
YKR082W	YAL008W
YKR092C	YAL008W
YLL002W	YAL008W
YLL013C	YAL008W
YLR015W	YAL008W
YLR025W	YAL008W
YLR032W	YAL008W
YLR039C	YAL008W
YLR048W	YAL008W
YLR052W	YAL008W
YLR055C	YAL008W
YLR085C	YAL008W
YLR095C	YAL008W
YLR131C	YAL008W
YLR150W	YAL008W
YLR182W	YAL008W
YLR234W	YAL008W
YLR262C	YAL008W
YLR271W	YAL008W
YLR278C	YAL008W
YLR304C	YAL008W
YLR320W	YAL008W
YLR342W	YAL008W
YLR352W	YAL008W
YLR357W	YAL008W
YLR368W	YAL008W
YLR384C	YAL008W
YLR403W	YAL008W
YLR418C	YAL008W
YLR421C	YAL008W
YLR431C	YAL008W
YML013W	YAL008W
YML041C	YAL008W
YML082W	YAL008W
YML100W	YAL008W
YML113W	YAL008W
YML124C	YAL008W
YMR016C	YAL008W
YMR031C	YAL008W
YMR078C	YAL008W
YMR116C	YAL008W
YMR173W	YAL008W
YMR179W	YAL008W
YMR186W	YAL008W
YMR190C	YAL008W
YMR202W	YAL008W
YMR205C	YAL008W
YMR224C	YAL008W
YMR258C	YAL008W
YMR263W	YAL008W
YMR294W	YAL008W
YNL021W	YAL008W
YNL022C	YAL008W
YNL025C	YAL008W
YNL032W	YAL008W
YNL056W	YAL008W
YNL097C	YAL008W
YNL106C	YAL008W
YNL107W	YAL008W
YNL119W	YAL008W
YNL136W	YAL008W
YNL138W	YAL008W
YNL147W	YAL008W
YNL186W	YAL008W
YNL187W	YAL008W
YNL199C	YAL008W
YNL213C	YAL008W
YNL215W	YAL008W
YNL227C	YAL008W
YNL229C	YAL008W
YNL230C	YAL008W
YNL236W	YAL008W
YNL241C	YAL008W
YNL248C	YAL008W
YNL250W	YAL008W
YNL323W	YAL008W
YNR010W	YAL008W
YNR051C	YAL008W
YOL051W	YAL008W
YOL072W	YAL008W
YOL081W	YAL008W
YOL089C	YAL008W
YOL090W	YAL008W
YOL093W	YAL008W
YOL108C	YAL008W
YOL110W	YAL008W
YOL115W	YAL008W
YOL136C	YAL008W
YOL148C	YAL008W
YOR014W	YAL008W
YOR061W	YAL008W
YOR064C	YAL008W
YOR141C	YAL008W
YOR156C	YAL008W
YOR179C	YAL008W
YOR205C	YAL008W
YOR209C	YAL008W
YOR213C	YAL008W
YOR279C	YAL008W
YOR360C	YAL008W
YPL022W	YAL008W
YPL024W	YAL008W
YPL031C	YAL008W
YPL042C	YAL008W
YPL045W	YAL008W
YPL046C	YAL008W
YPL049C	YAL008W
YPL055C	YAL008W
YPL072W	YAL008W
YPL084W	YAL008W
YPL086C	YAL008W
YPL121C	YAL008W
YPL123C	YAL008W
YPL125W	YAL008W
YPL138C	YAL008W
YPL144W	YAL008W
YPL180W	YAL008W
YPL184C	YAL008W
YPL193W	YAL008W
YPL212C	YAL008W
YPL219W	YAL008W
YPL226W	YAL008W
YPL254W	YAL008W
YPL268W	YAL008W
YPL273W	YAL008W
YPR018W	YAL008W
YPR066W	YAL008W
YPR119W	YAL008W
YPR120C	YAL008W
YPR125W	YAL008W
YPR135W	YAL008W
YPR141C	YAL008W
YPR149W	YAL008W
YPR153W	YAL008W
YPR160W	YAL008W
YPR164W	YAL008W
YPR173C	YAL008W
YPR179C	YAL008W
YAL013W	YAL009W
YBL024W	YAL009W
YBL079W	YAL009W
YBR062C	YAL009W
YBR082C	YAL009W
YBR095C	YAL009W
YBR112C	YAL009W
YBR289W	YAL009W
YCL016C	YAL009W
YCL037C	YAL009W
YCR084C	YAL009W
YDL002C	YAL009W
YDL076C	YAL009W
YDR123C	YAL009W
YDR176W	YAL009W
YDR295C	YAL009W
YDR315C	YAL009W
YDR323C	YAL009W
YDR364C	YAL009W
YDR378C	YAL009W
YDR432W	YAL009W
YDR448W	YAL009W
YDR463W	YAL009W
YDR496C	YAL009W
YDR520C	YAL009W
YEL013W	YAL009W
YEL043W	YAL009W
YEL044W	YAL009W
YER040W	YAL009W
YER068W	YAL009W
YER110C	YAL009W
YER116C	YAL009W
YER151C	YAL009W
YFL013C	YAL009W
YGL029W	YAL009W
YGL070C	YAL009W
YGL071W	YAL009W
YGL078C	YAL009W
YGL100W	YAL009W
YGL173C	YAL009W
YGL194C	YAL009W
YGL197W	YAL009W
YGL237C	YAL009W
YGL246C	YAL009W
YGL251C	YAL009W
YGL252C	YAL009W
YGR063C	YAL009W
YGR089W	YAL009W
YGR104C	YAL009W
YGR157W	YAL009W
YGR184C	YAL009W
YGR252W	YAL009W
YHR003C	YAL009W
YHR041C	YAL009W
YHR066W	YAL009W
YHR077C	YAL009W
YHR178W	YAL009W
YIL038C	YAL009W
YIL133C	YAL009W
YIR005W	YAL009W
YIR023W	YAL009W
YIR033W	YAL009W
YJL168C	YAL009W
YJL176C	YAL009W
YJR060W	YAL009W
YJR063W	YAL009W
YJR073C	YAL009W
YJR122W	YAL009W
YKL054C	YAL009W
YKL057C	YAL009W
YKL139W	YAL009W
YKL160W	YAL009W
YKR001C	YAL009W
YKR023W	YAL009W
YKR029C	YAL009W
YKR057W	YAL009W
YKR092C	YAL009W
YLR052W	YAL009W
YLR150W	YAL009W
YLR226W	YAL009W
YLR262C	YAL009W
YLR320W	YAL009W
YLR342W	YAL009W
YLR357W	YAL009W
YLR384C	YAL009W
YLR401C	YAL009W
YML041C	YAL009W
YML102W	YAL009W
YML121W	YAL009W
YML124C	YAL009W
YMR039C	YAL009W
YMR075W	YAL009W
YMR091C	YAL009W
YMR179W	YAL009W
YMR205C	YAL009W
YMR263W	YAL009W
YMR269W	YAL009W
YNL021W	YAL009W
YNL097C	YAL009W
YNL107W	YAL009W
YNL136W	YAL009W
YNL147W	YAL009W
YNL187W	YAL009W
YNL248C	YAL009W
YNL307C	YAL009W
YNL323W	YAL009W
YNL330C	YAL009W
YNR004W	YAL009W
YNR051C	YAL009W
YOL004W	YAL009W
YOL051W	YAL009W
YOL072W	YAL009W
YOL081W	YAL009W
YOR123C	YAL009W
YOR140W	YAL009W
YOR141C	YAL009W
YOR179C	YAL009W
YOR229W	YAL009W
YOR243C	YAL009W
YOR295W	YAL009W
YPL045W	YAL009W
YPL049C	YAL009W
YPL125W	YAL009W
YPL157W	YAL009W
YPL181W	YAL009W
YPL213W	YAL009W
YPL273W	YAL009W
YPR023C	YAL009W
YPR101W	YAL009W
YPR135W	YAL009W
YPR179C	YAL009W
YAL009W	YAL010C
YAL011W	YAL010C
YBL039C	YAL010C
YBR081C	YAL010C
YBR097W	YAL010C
YBR103W	YAL010C
YBR279W	YAL010C
YCL016C	YAL010C
YDL160C	YAL010C
YDR028C	YAL010C
YDR069C	YAL010C
YDR137W	YAL010C
YDR159W	YAL010C
YDR173C	YAL010C
YDR295C	YAL010C
YDR320C	YAL010C
YDR323C	YAL010C
YDR392W	YAL010C
YER116C	YAL010C
YER151C	YAL010C
YGL025C	YAL010C
YGL058W	YAL010C
YGL131C	YAL010C
YGL194C	YAL010C
YGL211W	YAL010C
YGR072W	YAL010C
YGR133W	YAL010C
YGR157W	YAL010C
YHR115C	YAL010C
YIL036W	YAL010C
YJL204C	YAL010C
YJR073C	YAL010C
YKL010C	YAL010C
YKL054C	YAL010C
YLR048W	YAL010C
YLR226W	YAL010C
YLR262C	YAL010C
YLR357W	YAL010C
YLR403W	YAL010C
YLR418C	YAL010C
YMR080C	YAL010C
YMR179W	YAL010C
YNL021W	YAL010C
YNL236W	YAL010C
YNL241C	YAL010C
YNL248C	YAL010C
YNL307C	YAL010C
YOL081W	YAL010C
YOL108C	YAL010C
YOL145C	YAL010C
YOL148C	YAL010C
YPL045W	YAL010C
YPL047W	YAL010C
YPL055C	YAL010C
YPL084W	YAL010C
YPL123C	YAL010C
YPL157W	YAL010C
YPL254W	YAL010C
YPR179C	YAL010C
YAL021C	YAL011W
YAL056W	YAL011W
YBR081C	YAL011W
YBR112C	YAL011W
YCR084C	YAL011W
YDL013W	YAL011W
YDL160C	YAL011W
YDR392W	YAL011W
YDR448W	YAL011W
YER068W	YAL011W
YER116C	YAL011W
YGL100W	YAL011W
YGL173C	YAL011W
YHL002W	YAL011W
YIL084C	YAL011W
YJL115W	YAL011W
YJL168C	YAL011W
YKL002W	YAL011W
YKL139W	YAL011W
YKL143W	YAL011W
YLR025W	YAL011W
YLR320W	YAL011W
YLR403W	YAL011W
YMR179W	YAL011W
YMR224C	YAL011W
YNL025C	YAL011W
YNL138W	YAL011W
YNL186W	YAL011W
YNR009W	YAL011W
YOL004W	YAL011W
YOL012C	YAL011W
YOL081W	YAL011W
YOL136C	YAL011W
YPL031C	YAL011W
YPL055C	YAL011W
YPL254W	YAL011W
YPR135W	YAL011W
YAL021C	YAL012W
YAL040C	YAL012W
YBL051C	YAL012W
YBL079W	YAL012W
YBR081C	YAL012W
YBR097W	YAL012W
YBR103W	YAL012W
YBR112C	YAL012W
YBR279W	YAL012W
YBR285W	YAL012W
YBR289W	YAL012W
YBR297W	YAL012W
YCR053W	YAL012W
YCR077C	YAL012W
YCR084C	YAL012W
YDL005C	YAL012W
YDL020C	YAL012W
YDL074C	YAL012W
YDL090C	YAL012W
YDL160C	YAL012W
YDL213C	YAL012W
YDR028C	YAL012W
YDR073W	YAL012W
YDR074W	YAL012W
YDR079C-A	YAL012W
YDR101C	YAL012W
YDR176W	YAL012W
YDR265W	YAL012W
YDR295C	YAL012W
YDR320C	YAL012W
YDR323C	YAL012W
YDR332W	YAL012W
YDR334W	YAL012W
YDR364C	YAL012W
YDR392W	YAL012W
YDR436W	YAL012W
YDR443C	YAL012W
YDR448W	YAL012W
YDR463W	YAL012W
YER068W	YAL012W
YER111C	YAL012W
YER139C	YAL012W
YER151C	YAL012W
YER177W	YAL012W
YFL001W	YAL012W
YGL016W	YAL012W
YGL025C	YAL012W
YGL035C	YAL012W
YGL070C	YAL012W
YGL078C	YAL012W
YGL100W	YAL012W
YGL115W	YAL012W
YGL121C	YAL012W
YGL125W	YAL012W
YGL127C	YAL012W
YGL173C	YAL012W
YGL197W	YAL012W
YGL246C	YAL012W
YGL252C	YAL012W
YGR056W	YAL012W
YGR072W	YAL012W
YGR104C	YAL012W
YGR108W	YAL012W
YGR122W	YAL012W
YGR162W	YAL012W
YGR270W	YAL012W
YGR271C-A	YAL012W
YHR003C	YAL012W
YHR041C	YAL012W
YHR111W	YAL012W
YHR187W	YAL012W
YIL008W	YAL012W
YIL009C-A	YAL012W
YIL017C	YAL012W
YIL033C	YAL012W
YIL036W	YAL012W
YIL112W	YAL012W
YIR026C	YAL012W
YIR033W	YAL012W
YJL056C	YAL012W
YJL105W	YAL012W
YJL115W	YAL012W
YJL124C	YAL012W
YJL176C	YAL012W
YJR014W	YAL012W
YJR060W	YAL012W
YJR063W	YAL012W
YJR073C	YAL012W
YJR082C	YAL012W
YJR090C	YAL012W
YKL002W	YAL012W
YKL009W	YAL012W
YKL020C	YAL012W
YKL054C	YAL012W
YKL143W	YAL012W
YKL160W	YAL012W
YKR001C	YAL012W
YKR029C	YAL012W
YKR060W	YAL012W
YLR015W	YAL012W
YLR048W	YAL012W
YLR052W	YAL012W
YLR055C	YAL012W
YLR074C	YAL012W
YLR085C	YAL012W
YLR150W	YAL012W
YLR176C	YAL012W
YLR180W	YAL012W
YLR182W	YAL012W
YLR226W	YAL012W
YLR342W	YAL012W
YLR384C	YAL012W
YLR403W	YAL012W
YLR418C	YAL012W
YLR431C	YAL012W
YML062C	YAL012W
YML097C	YAL012W
YML100W	YAL012W
YML102W	YAL012W
YMR014W	YAL012W
YMR075W	YAL012W
YMR078C	YAL012W
YMR080C	YAL012W
YMR091C	YAL012W
YMR116C	YAL012W
YMR269W	YAL012W
YMR275C	YAL012W
YMR310C	YAL012W
YMR312W	YAL012W
YNL022C	YAL012W
YNL025C	YAL012W
YNL106C	YAL012W
YNL136W	YAL012W
YNL138W	YAL012W
YNL147W	YAL012W
YNL213C	YAL012W
YNL236W	YAL012W
YNL241C	YAL012W
YNL330C	YAL012W
YNR006W	YAL012W
YNR023W	YAL012W
YOL041C	YAL012W
YOL051W	YAL012W
YOL072W	YAL012W
YOL081W	YAL012W
YOL093W	YAL012W
YOL136C	YAL012W
YOL148C	YAL012W
YOR001W	YAL012W
YOR123C	YAL012W
YOR140W	YAL012W
YOR162C	YAL012W
YOR205C	YAL012W
YOR290C	YAL012W
YPL031C	YAL012W
YPL042C	YAL012W
YPL045W	YAL012W
YPL055C	YAL012W
YPL084W	YAL012W
YPL086C	YAL012W
YPL101W	YAL012W
YPL123C	YAL012W
YPL125W	YAL012W
YPL144W	YAL012W
YPL157W	YAL012W
YPL179W	YAL012W
YPL181W	YAL012W
YPL184C	YAL012W
YPL193W	YAL012W
YPL212C	YAL012W
YPL254W	YAL012W
YPL268W	YAL012W
YPL273W	YAL012W
YPR009W	YAL012W
YPR101W	YAL012W
YPR135W	YAL012W
YPR153W	YAL012W
YPR160W	YAL012W
YPR164W	YAL012W
YPR173C	YAL012W
YPR189W	YAL012W
YAL011W	YAL013W
YAR018C	YAL013W
YBL003C	YAL013W
YBR030W	YAL013W
YBR081C	YAL013W
YBR097W	YAL013W
YBR103W	YAL013W
YBR215W	YAL013W
YBR231C	YAL013W
YBR279W	YAL013W
YCL016C	YAL013W
YCL037C	YAL013W
YDL006W	YAL013W
YDL013W	YAL013W
YDL074C	YAL013W
YDL154W	YAL013W
YDR004W	YAL013W
YDR030C	YAL013W
YDR137W	YAL013W
YDR162C	YAL013W
YDR174W	YAL013W
YDR206W	YAL013W
YDR320C	YAL013W
YDR323C	YAL013W
YDR332W	YAL013W
YDR335W	YAL013W
YDR364C	YAL013W
YDR378C	YAL013W
YDR392W	YAL013W
YDR448W	YAL013W
YDR457W	YAL013W
YDR463W	YAL013W
YDR485C	YAL013W
YDR495C	YAL013W
YDR520C	YAL013W
YEL013W	YAL013W
YEL044W	YAL013W
YER027C	YAL013W
YER059W	YAL013W
YER068W	YAL013W
YER132C	YAL013W
YER161C	YAL013W
YGL029W	YAL013W
YGL058W	YAL013W
YGL100W	YAL013W
YGL133W	YAL013W
YGL168W	YAL013W
YGL173C	YAL013W
YGL174W	YAL013W
YGL175C	YAL013W
YGL192W	YAL013W
YGL197W	YAL013W
YGL244W	YAL013W
YGL252C	YAL013W
YGL253W	YAL013W
YGR072W	YAL013W
YGR097W	YAL013W
YGR135W	YAL013W
YGR157W	YAL013W
YGR180C	YAL013W
YGR200C	YAL013W
YGR240C	YAL013W
YGR270W	YAL013W
YGR288W	YAL013W
YHL020C	YAL013W
YHR003C	YAL013W
YHR077C	YAL013W
YHR079C	YAL013W
YHR111W	YAL013W
YHR178W	YAL013W
YHR187W	YAL013W
YIL008W	YAL013W
YIL009C-A	YAL013W
YIL033C	YAL013W
YIL036W	YAL013W
YIL084C	YAL013W
YIL112W	YAL013W
YJL115W	YAL013W
YJL176C	YAL013W
YJR073C	YAL013W
YJR102C	YAL013W
YJR127C	YAL013W
YKL113C	YAL013W
YKL126W	YAL013W
YKL139W	YAL013W
YKL185W	YAL013W
YKR029C	YAL013W
YKR057W	YAL013W
YKR072C	YAL013W
YLL013C	YAL013W
YLL054C	YAL013W
YLR021W	YAL013W
YLR048W	YAL013W
YLR055C	YAL013W
YLR085C	YAL013W
YLR148W	YAL013W
YLR182W	YAL013W
YLR226W	YAL013W
YLR262C	YAL013W
YLR304C	YAL013W
YLR320W	YAL013W
YLR325C	YAL013W
YLR376C	YAL013W
YLR403W	YAL013W
YLR418C	YAL013W
YML036W	YAL013W
YML041C	YAL013W
YML097C	YAL013W
YML113W	YAL013W
YML124C	YAL013W
YMR014W	YAL013W
YMR031C	YAL013W
YMR080C	YAL013W
YMR091C	YAL013W
YMR179W	YAL013W
YMR205C	YAL013W
YMR231W	YAL013W
YMR304W	YAL013W
YMR312W	YAL013W
YNL022C	YAL013W
YNL068C	YAL013W
YNL072W	YAL013W
YNL097C	YAL013W
YNL136W	YAL013W
YNL138W	YAL013W
YNL142W	YAL013W
YNL155W	YAL013W
YNL186W	YAL013W
YNL199C	YAL013W
YNL209W	YAL013W
YNL227C	YAL013W
YNL250W	YAL013W
YNL278W	YAL013W
YNL298W	YAL013W
YNL307C	YAL013W
YNR006W	YAL013W
YOL012C	YAL013W
YOL136C	YAL013W
YOL145C	YAL013W
YOL148C	YAL013W
YOR023C	YAL013W
YOR123C	YAL013W
YOR140W	YAL013W
YOR229W	YAL013W
YOR230W	YAL013W
YOR338W	YAL013W
YOR371C	YAL013W
YPL033C	YAL013W
YPL049C	YAL013W
YPL055C	YAL013W
YPL180W	YAL013W
YPL181W	YAL013W
YPL199C	YAL013W
YPL268W	YAL013W
YPR065W	YAL013W
YPR120C	YAL013W
YPR164W	YAL013W
YPR173C	YAL013W
YAL015C	YAL014C
YAL021C	YAL014C
YBL003C	YAL014C
YBL006C	YAL014C
YBL051C	YAL014C
YBR028C	YAL014C
YBR030W	YAL014C
YBR103W	YAL014C
YBR112C	YAL014C
YBR273C	YAL014C
YBR279W	YAL014C
YBR285W	YAL014C
YCL010C	YAL014C
YCR020W-B	YAL014C
YCR077C	YAL014C
YCR084C	YAL014C
YDL047W	YAL014C
YDL076C	YAL014C
YDL090C	YAL014C
YDL154W	YAL014C
YDL160C	YAL014C
YDR005C	YAL014C
YDR028C	YAL014C
YDR049W	YAL014C
YDR137W	YAL014C
YDR173C	YAL014C
YDR176W	YAL014C
YDR206W	YAL014C
YDR295C	YAL014C
YDR310C	YAL014C
YDR320C	YAL014C
YDR323C	YAL014C
YDR332W	YAL014C
YDR363W-A	YAL014C
YDR364C	YAL014C
YDR378C	YAL014C
YDR395W	YAL014C
YDR432W	YAL014C
YDR448W	YAL014C
YDR496C	YAL014C
YEL013W	YAL014C
[truncated: 989,445+ more rows]
