# Supplementary material for: De-Novo Learning of Genome-Scale Regulatory Networks in S. cerevisiae
Source: PLoS One. 2014 Sep 12;9(9):e106479. doi: 10.1371/journal.pone.0106479 (PMC4162580; doi:10.1371/journal.pone.0106479)
Supplement: Spreadsheet S3 — Gold-standard Network #1. (XLSX) [file pone.0106479.s020.xlsx]

## Sheet: Gold_standard_network1
Transcription factor	Direct regulatory targets of that transcription factor
YBL005W	YBL006C
YBL021C	YBR039W
YBL021C	YDL171C
YBL021C	YER174C
YBL021C	YGL187C
YBL021C	YHR051W
YBL021C	YLL027W
YBL021C	YLR220W
YBL021C	YML119W
YBL021C	YML120C
YBL021C	YPL207W
YBL103C	YBL043W
YBL103C	YDL066W
YBL103C	YDR127W
YBL103C	YDR508C
YBL103C	YGR052W
YBL103C	YHR162W
YBL103C	YIL056W
YBL103C	YJL088W
YBL103C	YJR109C
YBL103C	YJR148W
YBL103C	YLR130C
YBL103C	YLR267W
YBL103C	YMR251W-A
YBL103C	YNL036W
YBL103C	YNL037C
YBL103C	YOR136W
YBL103C	YPL135W
YBR083W	YAR015W
YBR083W	YBL016W
YBR083W	YDR309C
YBR083W	YER118C
YBR083W	YGR014W
YBR083W	YIL119C
YBR083W	YKR091W
YBR083W	YOL105C
YBR083W	YPR158W-A
YDL020C	YBL022C
YDL020C	YBR049C
YDL020C	YCR061W
YDL020C	YDL143W
YDL020C	YDL144C
YDL020C	YDR363W-A
YDL020C	YDR394W
YDL020C	YDR427W
YDL020C	YEL037C
YDL020C	YER012W
YDL020C	YER021W
YDL020C	YER094C
YDL020C	YFL024C
YDL020C	YFR003C
YDL020C	YFR004W
YDL020C	YFR010W
YDL020C	YFR050C
YDL020C	YGL010W
YDL020C	YGL011C
YDL020C	YGL012W
YDL020C	YGL013C
YDL020C	YGL047W
YDL020C	YGL048C
YDL020C	YGL173C
YDL020C	YGR048W
YDL020C	YGR135W
YDL020C	YGR142W
YDL020C	YGR253C
YDL020C	YGR254W
YDL020C	YIL075C
YDL020C	YJL001W
YDL020C	YKL145W
YDL020C	YKL210W
YDL020C	YLR421C
YDL020C	YML092C
YDL020C	YNL155W
YDL020C	YNL250W
YDL020C	YOL038W
YDL020C	YOR052C
YDL020C	YOR157C
YDL020C	YOR158W
YDL020C	YOR259C
YDL020C	YOR260W
YDL020C	YOR261C
YDL020C	YPR107C
YDL020C	YPR108W
YDL056W	YAR007C
YDL056W	YAR008W
YDL056W	YBL035C
YDL056W	YBR078W
YDL056W	YCL061C
YDL056W	YCR065W
YDL056W	YDL003W
YDL056W	YDL017W
YDL056W	YDL018C
YDL056W	YDL101C
YDL056W	YDR097C
YDL056W	YDR113C
YDL056W	YDR115W
YDL056W	YDR263C
YDL056W	YDR309C
YDL056W	YDR451C
YDL056W	YDR452W
YDL056W	YDR507C
YDL056W	YDR528W
YDL056W	YER070W
YDL056W	YER111C
YDL056W	YER118C
YDL056W	YGR041W
YDL056W	YGR109C
YDL056W	YGR109W-B
YDL056W	YGR189C
YDL056W	YHR061C
YDL056W	YHR149C
YDL056W	YHR153C
YDL056W	YHR154W
YDL056W	YIL026C
YDL056W	YIL140W
YDL056W	YJL187C
YDL056W	YJL194W
YDL056W	YJL196C
YDL056W	YJR001W
YDL056W	YJR030C
YDL056W	YKL007W
YDL056W	YKL008C
YDL056W	YKL101W
YDL056W	YKL103C
YDL056W	YLR103C
YDL056W	YML012W
YDL056W	YMR078C
YDL056W	YMR179W
YDL056W	YMR305C
YDL056W	YMR306W
YDL056W	YMR307W
YDL056W	YNL312W
YDL056W	YNR009W
YDL056W	YOR075W
YDL056W	YPL152W
YDL056W	YPL267W
YDL056W	YPR120C
YDL056W	YPR174C
YDL056W	YPR175W
YDL106C	YCL030C
YDL106C	YJL159W
YDL106C	YNL036W
YDR043C	YBR158W
YDR043C	YEL040W
YDR043C	YER001W
YDR043C	YIL020C
YDR043C	YJL107C
YDR043C	YJL194W
YDR043C	YJL196C
YDR043C	YKL096W
YDR043C	YKR066C
YDR043C	YLR012C
YDR043C	YLR187W
YDR043C	YNL231C
YDR043C	YNR060W
YDR043C	YPR157W
YDR123C	YBR029C
YDR123C	YBR030W
YDR123C	YCR057C
YDR123C	YDL049C
YDR123C	YDR147W
YDR123C	YDR169C
YDR123C	YDR497C
YDR123C	YGR238C
YDR123C	YHL020C
YDR123C	YJL141C
YDR123C	YJL153C
YDR123C	YJR105W
YDR123C	YKL182W
YDR123C	YML075C
YDR123C	YNL169C
YDR123C	YNR016C
YDR123C	YOR234C
YDR123C	YPL231W
YDR146C	YBR157C
YDR146C	YBR158W
YDR146C	YDL117W
YDR146C	YDL119C
YDR146C	YDL179W
YDR146C	YDL227C
YDR146C	YDR397C
YDR146C	YGR086C
YDR146C	YKL163W
YDR146C	YKL164C
YDR146C	YKL185W
YDR146C	YLR194C
YDR146C	YNL078W
YDR146C	YNL192W
YDR146C	YNL327W
YDR146C	YNL328C
YDR146C	YPL157W
YDR146C	YPL158C
YDR216W	YPL147W
YDR310C	YBR148W
YDR310C	YBR180W
YDR310C	YCL048W
YDR310C	YDR042C
YDR310C	YDR281C
YDR310C	YDR311W
YDR310C	YDR322W
YDR310C	YFL040W
YDR310C	YFR023W
YDR310C	YFR032C
YDR310C	YGL138C
YDR310C	YGL170C
YDR310C	YGR059W
YDR310C	YGR256W
YDR310C	YGR258C
YDR310C	YGR260W
YDR310C	YHR184W
YDR310C	YHR185C
YDR310C	YIR027C
YDR310C	YIR028W
YDR310C	YJL043W
YDR310C	YJR025C
YDR310C	YJR078W
YDR310C	YLR082C
YDR310C	YMR272C
YDR310C	YNL318C
YDR310C	YOL102C
YDR310C	YOR255W
YDR310C	YOR365C
YDR310C	YPL075W
YDR421W	YHR137W
YDR463W	YBR043C
YDR463W	YDR046C
YDR463W	YDR508C
YDR463W	YDR510W
YDR463W	YGR055W
YDR463W	YJR013W
YDR463W	YKL161C
YDR463W	YLR094C
YDR463W	YOL125W
YDR463W	YOL126C
YDR463W	YPL265W
YDR520C	YBR137W
YDR520C	YER036C
YDR520C	YER037W
YDR520C	YHR128W
YEL009C	YBR068C
YEL009C	YBR147W
YEL009C	YBR256C
YEL009C	YCL030C
YEL009C	YDL066W
YEL009C	YDL170W
YEL009C	YDL198C
YEL009C	YDR035W
YEL009C	YDR127W
YEL009C	YEL063C
YEL009C	YER052C
YEL009C	YGL125W
YEL009C	YGL180W
YEL009C	YGL184C
YEL009C	YGR161C
YEL009C	YHR018C
YEL009C	YHR029C
YEL009C	YHR071W
YEL009C	YIL056W
YEL009C	YIL116W
YEL009C	YIL117C
YEL009C	YIR034C
YEL009C	YJL088W
YEL009C	YJL130C
YEL009C	YJR025C
YEL009C	YJR109C
YEL009C	YKL103C
YEL009C	YLR267W
YEL009C	YMR062C
YEL009C	YMR095C
YEL009C	YMR096W
YEL009C	YMR136W
YEL009C	YMR195W
YEL009C	YNL104C
YEL009C	YOL058W
YEL009C	YOL117W
YEL009C	YOL119C
YEL009C	YOL140W
YEL009C	YOR222W
YEL009C	YPL135W
YEL009C	YPL250C
YEL009C	YPL264C
YEL009C	YPR144C
YEL009C	YPR145W
YER040W	YDL170W
YER040W	YDL171C
YER040W	YDL215C
YER040W	YDR031W
YER040W	YGL006W
YER040W	YGR234W
YER040W	YHL016C
YER040W	YHR029C
YER040W	YIR027C
YER040W	YJL172W
YER040W	YJL173C
YER040W	YJR148W
YER040W	YJR152W
YER040W	YLL015W
YER040W	YNL141W
YER040W	YOL058W
YER040W	YOL109W
YER040W	YOL117W
YER040W	YOL119C
YER040W	YOR230W
YER040W	YPL265W
YER040W	YPR035W
YER040W	YPR144C
YER040W	YPR145W
YER111C	YBR070C
YER111C	YBR071W
YER111C	YBR112C
YER111C	YBR162C
YER111C	YCR065W
YER111C	YDL055C
YER111C	YDL227C
YER111C	YDR224C
YER111C	YDR225W
YER111C	YDR451C
YER111C	YDR507C
YER111C	YDR525W-A
YER111C	YER001W
YER111C	YER010C
YER111C	YER011W
YER111C	YER112W
YER111C	YER145C
YER111C	YFR017C
YER111C	YGL038C
YER111C	YGL253W
YER111C	YGR014W
YER111C	YGR109C
YER111C	YGR109W-A
YER111C	YGR109W-B
YER111C	YGR221C
YER111C	YHR061C
YER111C	YHR149C
YER111C	YIL056W
YER111C	YIL123W
YER111C	YJL187C
YER111C	YKL007W
YER111C	YKL008C
YER111C	YKL043W
YER111C	YKL096W
YER111C	YKL096W-A
YER111C	YKL101W
YER111C	YKL103C
YER111C	YKR042W
YER111C	YLR084C
YER111C	YML027W
YER111C	YMR016C
YER111C	YMR136W
YER111C	YMR179W
YER111C	YMR199W
YER111C	YMR305C
YER111C	YMR306W
YER111C	YNL231C
YER111C	YNL289W
YER111C	YNL298W
YER111C	YOL012C
YER111C	YOL113W
YER111C	YOL114C
YER111C	YOR246C
YER111C	YOR247W
YER111C	YPL163C
YER111C	YPL267W
YER111C	YPR119W
YER161C	YBR159W
YER161C	YHR175W
YER161C	YLR354C
YER161C	YOL086W-A
YER161C	YPL252C
YFL031W	YOL031C
YFR034C	YML123C
YGL035C	YDR441C
YGL131C	YAL039C
YGL131C	YBR138C
YGL131C	YBR145W
YGL131C	YCR091W
YGL131C	YHR138C
YGL131C	YJL093C
YGL131C	YNL182C
YGL131C	YPR104C
YGL131C	YPR158W
YGL237C	YDL170W
YGL237C	YDR210W
YGL237C	YDR377W
YGL237C	YDR529C
YGL237C	YER174C
YGL237C	YFR033C
YGL237C	YGL187C
YGL237C	YGR233C
YGL237C	YGR234W
YGL237C	YHR051W
YGL237C	YLL015W
YGL237C	YLR220W
YGL237C	YOL077W-A
YGL237C	YPL019C
YGL237C	YPL207W
YGL237C	YPR145W
YHL020C	YCR005C
YHL020C	YKL182W
YHL020C	YPR159W
YHL020C	YPR171W
YHR084W	YBL016W
YHR084W	YBR040W
YHR084W	YBR083W
YHR084W	YBR156C
YHR084W	YBR158W
YHR084W	YCL027W
YHR084W	YCL055W
YHR084W	YDR085C
YHR084W	YDR309C
YHR084W	YER155C
YHR084W	YGL162W
YHR084W	YGR014W
YHR084W	YGR108W
YHR084W	YGR189C
YHR084W	YGR221C
YHR084W	YHR005C
YHR084W	YHR152W
YHR084W	YIL037C
YHR084W	YJR054W
YHR084W	YKL189W
YHR084W	YKR091W
YHR084W	YLR452C
YHR084W	YML046W
YHR084W	YML047C
YHR084W	YMR305C
YHR084W	YNL192W
YHR084W	YNR044W
YHR084W	YOR247W
YHR084W	YPL048W
YHR084W	YPL049C
YHR084W	YPL156C
YHR084W	YPL163C
YHR084W	YPR005C
YHR084W	YPR122W
YHR178W	YDL049C
YHR178W	YDR011W
YHR178W	YDR231C
YHR178W	YDR232W
YHR178W	YDR248C
YHR178W	YDR294C
YHR178W	YEL041W
YHR178W	YHR163W
YHR178W	YHR183W
YHR178W	YIL159W
YHR178W	YIL160C
YHR178W	YLR354C
YHR178W	YMR315W
YHR178W	YNL273W
YHR178W	YNL274C
YHR178W	YPL061W
YHR206W	YBR054W
YHR206W	YBR157C
YHR206W	YCR073C
YHR206W	YDL049C
YHR206W	YDR044W
YHR206W	YDR309C
YHR206W	YER001W
YHR206W	YER011W
YHR206W	YGL038C
YHR206W	YGR052W
YHR206W	YGR086C
YHR206W	YGR279C
YHR206W	YIL119C
YHR206W	YJL105W
YHR206W	YJL116C
YHR206W	YKL062W
YHR206W	YKL086W
YHR206W	YKL087C
YHR206W	YKR042W
YHR206W	YKR052C
YHR206W	YLL019C
YHR206W	YLR257W
YHR206W	YML028W
YHR206W	YML052W
YHR206W	YMR145C
YHR206W	YMR305C
YHR206W	YNR018W
YHR206W	YOL058W
YHR206W	YOR226C
YHR206W	YPR009W
YHR206W	YPR013C
YHR206W	YPR065W
YHR206W	YPR149W
YIL036W	YBR110W
YIL036W	YBR168W
YIL036W	YDR028C
YIL036W	YDR067C
YIL036W	YDR068W
YIL036W	YDR372C
YIL036W	YDR373W
YIL036W	YHR171W
YIL131C	YBR139W
YIL131C	YCL064C
YIL131C	YCR075C
YIL131C	YDR263C
YIL131C	YER070W
YIL131C	YER124C
YIL131C	YER125W
YIL131C	YGL028C
YIL131C	YGR092W
YIL131C	YGR099W
YIL131C	YHR084W
YIL131C	YKR054C
YIL131C	YLR209C
YIL131C	YLR210W
YIL131C	YMR198W
YIL131C	YPL116W
YIL131C	YPL177C
YIL131C	YPL227C
YJL056C	YJL055W
YJL089W	YER065C
YJR060W	YAL012W
YJR060W	YAL026C
YJR060W	YAL053W
YJR060W	YAL054C
YJR060W	YBR039W
YJR060W	YBR049C
YJR060W	YBR249C
YJR060W	YBR250W
YJR060W	YBR255C-A
YJR060W	YCR087C-A
YJR060W	YCR088W
YJR060W	YCR092C
YJR060W	YCR093W
YJR060W	YDL006W
YJR060W	YDL020C
YJR060W	YDL059C
YJR060W	YDR054C
YJR060W	YDR055W
YJR060W	YDR141C
YJR060W	YDR297W
YJR060W	YDR530C
YJR060W	YDR531W
YJR060W	YEL024W
YJR060W	YEL043W
YJR060W	YER043C
YJR060W	YER071C
YJR060W	YER094C
YJR060W	YER099C
YJR060W	YER114C
YJR060W	YER124C
YJR060W	YER177W
YJR060W	YFL018C
YJR060W	YFL023W
YJR060W	YFL024C
YJR060W	YFR030W
YJR060W	YFR049W
YJR060W	YGR052W
YJR060W	YGR060W
YJR060W	YGR200C
YJR060W	YGR204W
YJR060W	YGR223C
YJR060W	YGR234W
YJR060W	YHR033W
YJR060W	YHR042W
YJR060W	YHR083W
YJR060W	YHR089C
YJR060W	YHR099W
YJR060W	YHR112C
YJR060W	YHR113W
YJR060W	YHR136C
YJR060W	YHR137W
YJR060W	YIL033C
YJR060W	YIL088C
YJR060W	YIL118W
YJR060W	YIL119C
YJR060W	YIL126W
YJR060W	YIL127C
YJR060W	YIR006C
YJR060W	YIR007W
YJR060W	YIR017C
YJR060W	YJL101C
YJR060W	YJL109C
YJR060W	YJL166W
YJR060W	YJL167W
YJR060W	YJL168C
YJR060W	YJL186W
YJR060W	YJL187C
YJR060W	YJL209W
YJR060W	YJR009C
YJR060W	YJR010W
YJR060W	YJR137C
YJR060W	YJR138W
YJR060W	YJR147W
YJR060W	YKL016C
YJR060W	YKL191W
YJR060W	YKL192C
YJR060W	YLR092W
YJR060W	YML017W
YJR060W	YML119W
YJR060W	YML120C
YJR060W	YML123C
YJR060W	YMR196W
YJR060W	YMR197C
YJR060W	YMR198W
YJR060W	YMR217W
YJR060W	YMR301C
YJR060W	YNL036W
YJR060W	YNL037C
YJR060W	YNL063W
YJR060W	YNL095C
YJR060W	YNL103W
YJR060W	YNL104C
YJR060W	YNL220W
YJR060W	YNL277W
YJR060W	YNL283C
YJR060W	YNR013C
YJR060W	YNR014W
YJR060W	YNR051C
YJR060W	YOL064C
YJR060W	YOL101C
YJR060W	YOR064C
YJR060W	YOR065W
YJR060W	YOR098C
YJR060W	YOR099W
YJR060W	YOR299W
YJR060W	YOR327C
YJR060W	YPL206C
YJR060W	YPL235W
YJR060W	YPL236C
YJR060W	YPL250C
YJR060W	YPL254W
YKL015W	YHR037W
YKL015W	YOR306C
YKL020C	YJR011C
YKL032C	YDR441C
YKL032C	YIL118W
YKL032C	YIL119C
YKL032C	YKR075C
YKL032C	YKR076W
YKL038W	YHR094C
YKL062W	YML100W
YKL062W	YMR119W
YKL109W	YBL030C
YKL109W	YBL045C
YKL109W	YBL099W
YKL109W	YBR039W
YKL109W	YDL004W
YKL109W	YDL067C
YKL109W	YDL181W
YKL109W	YDR322C-A
YKL109W	YDR377W
YKL109W	YDR529C
YKL109W	YEL024W
YKL109W	YGL187C
YKL109W	YGL191W
YKL109W	YHR051W
YKL109W	YKL016C
YKL109W	YLR038C
YKL109W	YLR295C
YKL109W	YLR395C
YKL109W	YMR256C
YKL109W	YNL052W
YKL109W	YOL077W-A
YKL109W	YOR064C
YKL109W	YOR065W
YKL109W	YPR020W
YKL185W	YDR055W
YKL185W	YIL122W
YKL185W	YJL194W
YKL185W	YMR122W-A
YKR099W	YAL044C
YKR099W	YAL060W
YKR099W	YCL030C
YKR099W	YDR408C
YKR099W	YER091C
YKR099W	YGL184C
YKR099W	YGL186C
YKR099W	YGL234W
YKR099W	YGL236C
YKR099W	YGR061C
YKR099W	YGR204W
YKR099W	YKL218C
YKR099W	YKR080W
YKR099W	YLR058C
YKR099W	YLR359W
YKR099W	YMR120C
YKR099W	YMR188C
YKR099W	YMR189W
YKR099W	YMR244W
YKR099W	YMR300C
YKR099W	YOR128C
YLR098C	YCL063W
YLR098C	YCL064C
YLR131C	YBR158W
YLR131C	YDL127W
YLR131C	YDR155C
YLR131C	YER124C
YLR131C	YER125W
YLR131C	YER177W
YLR131C	YGL008C
YLR131C	YGL028C
YLR131C	YGL229C
YLR131C	YGR041W
YLR131C	YJR147W
YLR131C	YKL150W
YLR131C	YKL151C
YLR131C	YLR286C
YLR131C	YNL078W
YLR131C	YNL327W
YLR131C	YNR018W
YLR176C	YGR180C
YLR176C	YIL066C
YLR176C	YLR286C
YLR176C	YMR177W
YLR182W	YBL029C-A
YLR182W	YBL029W
YLR182W	YBL030C
YLR182W	YBR077C
YLR182W	YCR065W
YLR182W	YDL003W
YLR182W	YDL017W
YLR182W	YDL018C
YLR182W	YDL101C
YLR182W	YDL127W
YLR182W	YDR113C
YLR182W	YDR115W
YLR182W	YDR224C
YLR182W	YDR225W
YLR182W	YDR263C
YLR182W	YDR309C
YLR182W	YDR451C
YLR182W	YDR524C
YLR182W	YDR525W-A
YLR182W	YDR527W
YLR182W	YDR528W
YLR182W	YEL001C
YLR182W	YEL040W
YLR182W	YER001W
YLR182W	YER070W
YLR182W	YER111C
YLR182W	YER112W
YLR182W	YGL178W
YLR182W	YGL179C
YLR182W	YGL253W
YLR182W	YGR109C
YLR182W	YGR109W-A
YLR182W	YGR109W-B
YLR182W	YGR180C
YLR182W	YGR189C
YLR182W	YGR221C
YLR182W	YGR279C
YLR182W	YHR149C
YLR182W	YHR150W
YLR182W	YIL026C
YLR182W	YIL056W
YLR182W	YIL123W
YLR182W	YJL092W
YLR182W	YJL093C
YLR182W	YJL115W
YLR182W	YJL116C
YLR182W	YJL194W
YLR182W	YJL196C
YLR182W	YJR054W
YLR182W	YKL096W
YLR182W	YKL096W-A
YLR182W	YKR042W
YLR182W	YLR055C
YLR182W	YLR056W
YLR182W	YLR103C
YLR182W	YLR332W
YLR182W	YLR438W
YLR182W	YML027W
YLR182W	YML100W
YLR182W	YML101C
YLR182W	YMR016C
YLR182W	YMR135C
YLR182W	YMR136W
YLR182W	YMR179W
YLR182W	YMR199W
YLR182W	YMR305C
YLR182W	YMR306W
YLR182W	YNL231C
YLR182W	YNL273W
YLR182W	YNL274C
YLR182W	YNL289W
YLR182W	YNL298W
YLR182W	YNR009W
YLR182W	YNR044W
YLR182W	YOL113W
YLR182W	YOR074C
YLR182W	YOR075W
YLR182W	YOR246C
YLR182W	YOR372C
YLR182W	YOR373W
YLR182W	YPL163C
YLR182W	YPR120C
YLR182W	YPR121W
YLR182W	YPR159W
YLR256W	YEL038W
YLR256W	YER044C
YLR256W	YER048C
YLR256W	YHR007C
YLR256W	YJL048C
YLR256W	YJR047C
YLR256W	YJR048W
YLR256W	YKR046C
YLR256W	YML054C
YLR256W	YML075C
YLR256W	YMR201C
YLR256W	YNL111C
YLR256W	YOR065W
YLR256W	YOR356W
YLR256W	YPL218W
YLR403W	YBR188C
YLR403W	YML024W
YLR403W	YNL069C
YLR403W	YOL121C
YLR403W	YOR234C
YLR403W	YOR312C
YLR403W	YPL090C
YLR451W	YBR068C
YLR451W	YGL009C
YLR451W	YJR016C
YLR451W	YKL120W
YLR451W	YNL104C
YML007W	YGR209C
YML007W	YJL101C
YML007W	YJR104C
YML007W	YKL086W
YML007W	YKR052C
YML007W	YKR071C
YML007W	YNL134C
YML027W	YDR191W
YML027W	YEL032W
YML027W	YGR092W
YML027W	YLR273C
YML027W	YLR274W
YML051W	YBR019C
YML051W	YBR020W
YML099C	YER069W
YML099C	YFL023W
YML099C	YJL088W
YML099C	YOL058W
YML099C	YOL140W
YMR016C	YAL061W
YMR016C	YBL029C-A
YMR016C	YBL029W
YMR016C	YBL043W
YMR016C	YDR441C
YMR016C	YEL040W
YMR016C	YEL066W
YMR016C	YER033C
YMR016C	YER034W
YMR016C	YER045C
YMR016C	YGL158W
YMR016C	YGR238C
YMR016C	YGR249W
YMR016C	YIL119C
YMR016C	YJL105W
YMR016C	YJR127C
YMR016C	YKL043W
YMR016C	YKL062W
YMR016C	YLR300W
YMR016C	YMR017W
YMR016C	YMR056C
YMR016C	YMR058W
YMR016C	YMR122W-A
YMR016C	YMR136W
YMR016C	YNL180C
YMR016C	YOR178C
YMR016C	YPR013C
YMR019W	YBR046C
YMR019W	YBR047W
YMR019W	YBR222C
YMR019W	YEL020C
YMR019W	YIL166C
YMR019W	YPR128C
YMR021C	YER145C
YMR021C	YIL117C
YMR021C	YPL177C
YMR021C	YPR124W
YMR037C	YBR085C-A
YMR037C	YDR171W
YMR037C	YER177W
YMR037C	YGR052W
YMR037C	YGR088W
YMR037C	YGR256W
YMR037C	YKL085W
YMR037C	YKL096W
YMR037C	YKR066C
YMR037C	YLR258W
YMR037C	YML100W
YMR037C	YMR173W
YMR037C	YNL007C
YMR037C	YNL160W
YMR037C	YPR160W
YMR042W	YER069W
YMR042W	YFL023W
YMR042W	YJL088W
YMR042W	YOL140W
YMR070W	YEL060C
YMR070W	YKR042W
YMR070W	YPL135W
YNL068C	YAL024C
YNL068C	YBR053C
YNL068C	YBR054W
YNL068C	YBR077C
YNL068C	YBR078W
YNL068C	YBR092C
YNL068C	YBR138C
YNL068C	YBR139W
YNL068C	YCL054W
YNL068C	YDL101C
YNL068C	YDR032C
YNL068C	YDR033W
YNL068C	YER070W
YNL068C	YGL021W
YNL068C	YHL024W
YNL068C	YHL028W
YNL068C	YHR031C
YNL068C	YHR152W
YNL068C	YIL131C
YNL068C	YLR399C
YNL068C	YML052W
YNL068C	YML064C
YNL068C	YMR117C
YNL068C	YMR183C
YNL068C	YMR184W
YNL068C	YMR198W
YNL068C	YNL056W
YNL068C	YNL058C
YNL068C	YOR246C
YNL068C	YOR247W
YNL068C	YPL116W
YNL068C	YPL242C
YNL068C	YPR119W
YNL167C	YBL030C
YNL167C	YDR077W
YNL167C	YGL006W
YNL167C	YHR033W
YNL167C	YHR096C
YNL167C	YKL096W
YNL199C	YAL038W
YNL199C	YAL039C
YNL199C	YDR508C
YNL199C	YDR510W
YNL199C	YER177W
YNL199C	YGR060W
YNL199C	YHR174W
YNL199C	YJL148W
YNL199C	YJL194W
YNL199C	YJL196C
YNL199C	YJR009C
YNL199C	YJR010W
YNL199C	YKL060C
YNL199C	YKL152C
YNL199C	YMR205C
YNL199C	YNL066W
YNL199C	YOL084W
YNL199C	YOR138C
YNL314W	YDR032C
YNL314W	YIR027C
YNL314W	YIR028W
YNL314W	YIR030C
YOL028C	YGR234W
YOL108C	YBL106C
YOL108C	YBR029C
YOL108C	YBR030W
YOL108C	YDR147W
YOL108C	YDR497C
YOL108C	YER026C
YOL108C	YER043C
YOL108C	YGR157W
YOL108C	YGR238C
YOL108C	YHR123W
YOL108C	YJL048C
YOL108C	YJL168C
YOL108C	YJR105W
YOL108C	YKL182W
YOL108C	YNL169C
YOL108C	YNR016C
YOL108C	YNR017W
YOL108C	YPL231W
YOL108C	YPR013C
YOR028C	YBR072W
YOR028C	YDR300C
YOR028C	YDR338C
YOR028C	YDR441C
YOR028C	YER028C
YOR028C	YER045C
YOR028C	YFL004W
YOR028C	YGR234W
YOR028C	YGR238C
YOR028C	YJR133W
YOR028C	YJR147W
YOR028C	YKL110C
YOR028C	YLL054C
YOR028C	YMR177W
YOR028C	YMR244C-A
YOR028C	YMR246W
YOR028C	YNL087W
YOR028C	YNL180C
YOR028C	YPR065W
YOR113W	YLR023C
YOR358W	YBL099W
YOR358W	YDR077W
YOR358W	YDR529C
YOR358W	YGL187C
YOR358W	YGR234W
YOR358W	YHR051W
YOR358W	YLL027W
YOR358W	YPL207W
YOR358W	YPR144C
YOR358W	YPR145W
YPL038W	YER092W
YPL038W	YJL210W
YPL038W	YJL212C
YPL038W	YJR137C
YPL038W	YLR179C
YPL038W	YLR180W
YPL038W	YPR167C
YPL049C	YAR014C
YPL049C	YAR015W
YPL049C	YBL016W
YPL049C	YBL061C
YPL049C	YBR040W
YPL049C	YBR060C
YPL049C	YBR082C
YPL049C	YBR083W
YPL049C	YCL027W
YPL049C	YCL055W
YPL049C	YDL127W
YPL049C	YDR085C
YPL049C	YDR309C
YPL049C	YDR378C
YPL049C	YDR379W
YPL049C	YDR465C
YPL049C	YDR466W
YPL049C	YFL026W
YPL049C	YFL027C
YPL049C	YGR014W
YPL049C	YGR108W
YPL049C	YGR165W
YPL049C	YGR233C
YPL049C	YGR234W
YPL049C	YIL015W
YPL049C	YIL123W
YPL049C	YJL187C
YPL049C	YKL095W
YPL049C	YKL096W
YPL049C	YKL104C
YPL049C	YKL189W
YPL049C	YKR091W
YPL049C	YLR084C
YPL049C	YLR332W
YPL049C	YLR353W
YPL049C	YLR452C
YPL049C	YLR454W
YPL049C	YML047C
YPL049C	YMR232W
YPL049C	YMR306W
YPL049C	YNL053W
YPL049C	YNL272C
YPL049C	YNL279W
YPL049C	YNL280C
YPL049C	YNL289W
YPL049C	YNL298W
YPL049C	YNR054C
YPL049C	YOL082W
YPL049C	YPL156C
YPL049C	YPL163C
YPL049C	YPL177C
YPL049C	YPL192C
YPL049C	YPR005C
YPL049C	YPR119W
YPL049C	YPR171W
YPL089C	YJL106W
YPL089C	YKL096W
YPL089C	YKR091W
YPR065W	YBL029C-A
YPR065W	YBL029W
YPR065W	YDR077W
YPR065W	YGR146C
YPR065W	YGR255C
YPR065W	YGR256W
YPR065W	YIL056W
YPR065W	YKL109W
YPR065W	YMR136W
YPR065W	YOR032C
YPR065W	YPR063C
YPR199C	YCL054W

## Sheet: Gold_standard_network2
Transcription factor	Direct regulatory targets of that transcription factor
YBL005W	YBL006C
YBL021C	YBR039W
YBL021C	YDL171C
YBL021C	YDR377W
YBL021C	YER174C
YBL021C	YER175C
YBL021C	YFR023W
YBL021C	YGL187C
YBL021C	YGR234W
YBL021C	YHR001W-A
YBL021C	YHR051W
YBL021C	YLL027W
YBL021C	YLR220W
YBL021C	YML119W
YBL021C	YML120C
YBL021C	YPL207W
YBL103C	YBL015W
YBL103C	YBL043W
YBL103C	YBR248C
YBL103C	YCL030C
YBL103C	YDL066W
YBL103C	YDL170W
YBL103C	YDL171C
YBL103C	YDR127W
YBL103C	YDR508C
YBL103C	YGL027C
YBL103C	YGR052W
YBL103C	YGR142W
YBL103C	YHR018C
YBL103C	YHR071W
YBL103C	YHR162W
YBL103C	YIL056W
YBL103C	YJL088W
YBL103C	YJR109C
YBL103C	YJR148W
YBL103C	YJR152W
YBL103C	YKL109W
YBL103C	YLR130C
YBL103C	YLR267W
YBL103C	YLR304C
YBL103C	YMR251W-A
YBL103C	YNL036W
YBL103C	YNL037C
YBL103C	YNL231C
YBL103C	YNL278W
YBL103C	YNR001C
YBL103C	YOR136W
YBL103C	YPL135W
YBL103C	YPL250C
YBL103C	YPL252C
YBL103C	YPL265W
YBR083W	YAR015W
YBR083W	YBL016W
YBR083W	YDR309C
YBR083W	YER118C
YBR083W	YER155C
YBR083W	YGR014W
YBR083W	YIL119C
YBR083W	YKL096W
YBR083W	YKR091W
YBR083W	YLR413W
YBR083W	YOL105C
YBR083W	YOR247W
YBR083W	YPR158W-A
YCR106W	YPR065W
YDL020C	YBL022C
YDL020C	YBR049C
YDL020C	YBR062C
YDL020C	YBR170C
YDL020C	YCR061W
YDL020C	YDL140C
YDL020C	YDL143W
YDL020C	YDL144C
YDL020C	YDR363W-A
YDL020C	YDR394W
YDL020C	YDR427W
YDL020C	YEL037C
YDL020C	YER012W
YDL020C	YER021W
YDL020C	YER094C
YDL020C	YFL024C
YDL020C	YFL044C
YDL020C	YFL055W
YDL020C	YFR003C
YDL020C	YFR004W
YDL020C	YFR010W
YDL020C	YFR050C
YDL020C	YFR052W
YDL020C	YGL010W
YDL020C	YGL011C
YDL020C	YGL012W
YDL020C	YGL013C
YDL020C	YGL047W
YDL020C	YGL048C
YDL020C	YGL173C
YDL020C	YGR048W
YDL020C	YGR135W
YDL020C	YGR142W
YDL020C	YGR253C
YDL020C	YGR254W
YDL020C	YHR200W
YDL020C	YIL075C
YDL020C	YJL001W
YDL020C	YKL015W
YDL020C	YKL016C
YDL020C	YKL145W
YDL020C	YKL210W
YDL020C	YLR259C
YDL020C	YLR287C-A
YDL020C	YLR421C
YDL020C	YML092C
YDL020C	YNL155W
YDL020C	YNL250W
YDL020C	YOL038W
YDL020C	YOR052C
YDL020C	YOR157C
YDL020C	YOR158W
YDL020C	YOR259C
YDL020C	YOR260W
YDL020C	YOR261C
YDL020C	YPR107C
YDL020C	YPR108W
YDL056W	YAR007C
YDL056W	YAR008W
YDL056W	YBL035C
YDL056W	YBR078W
YDL056W	YCL061C
YDL056W	YCR065W
YDL056W	YDL003W
YDL056W	YDL017W
YDL056W	YDL018C
YDL056W	YDL055C
YDL056W	YDL101C
YDL056W	YDL156W
YDL056W	YDL197C
YDL056W	YDR043C
YDL056W	YDR097C
YDL056W	YDR113C
YDL056W	YDR115W
YDL056W	YDR263C
YDL056W	YDR309C
YDL056W	YDR451C
YDL056W	YDR452W
YDL056W	YDR507C
YDL056W	YDR528W
YDL056W	YER004W
YDL056W	YER070W
YDL056W	YER095W
YDL056W	YER111C
YDL056W	YER118C
YDL056W	YGR041W
YDL056W	YGR109C
YDL056W	YGR109W-B
YDL056W	YGR140W
YDL056W	YGR152C
YDL056W	YGR153W
YDL056W	YGR189C
YDL056W	YGR249W
YDL056W	YHR061C
YDL056W	YHR149C
YDL056W	YHR153C
YDL056W	YHR154W
YDL056W	YIL026C
YDL056W	YIL140W
YDL056W	YIL160C
YDL056W	YJL187C
YDL056W	YJL194W
YDL056W	YJL196C
YDL056W	YJR001W
YDL056W	YJR030C
YDL056W	YKL007W
YDL056W	YKL008C
YDL056W	YKL045W
YDL056W	YKL101W
YDL056W	YKL103C
YDL056W	YKL113C
YDL056W	YKR091W
YDL056W	YLR049C
YDL056W	YLR056W
YDL056W	YLR103C
YDL056W	YLR120C
YDL056W	YLR342W
YDL056W	YLR383W
YDL056W	YML012W
YDL056W	YML109W
YDL056W	YMR070W
YDL056W	YMR078C
YDL056W	YMR136W
YDL056W	YMR179W
YDL056W	YMR305C
YDL056W	YMR306W
YDL056W	YMR307W
YDL056W	YNL088W
YDL056W	YNL312W
YDL056W	YNR009W
YDL056W	YOL007C
YDL056W	YOL082W
YDL056W	YOR075W
YDL056W	YPL127C
YDL056W	YPL144W
YDL056W	YPL152W
YDL056W	YPL267W
YDL056W	YPR017C
YDL056W	YPR120C
YDL056W	YPR174C
YDL056W	YPR175W
YDL106C	YBR161W
YDL106C	YCL030C
YDL106C	YDL124W
YDL106C	YGR052W
YDL106C	YIL017C
YDL106C	YJL159W
YDL106C	YKL156W
YDL106C	YML123C
YDL106C	YMR195W
YDL106C	YNL036W
YDL106C	YOL084W
YDL106C	YPL135W
YDL106C	YPL137C
YDR043C	YBR067C
YDR043C	YBR085C-A
YDR043C	YBR158W
YDR043C	YDL049C
YDR043C	YDR403W
YDR043C	YEL038W
YDR043C	YEL039C
YDR043C	YEL040W
YDR043C	YER001W
YDR043C	YGR266W
YDR043C	YHR033W
YDR043C	YIL020C
YDR043C	YJL107C
YDR043C	YJL194W
YDR043C	YJL196C
YDR043C	YKL096W
YDR043C	YKR066C
YDR043C	YLR012C
YDR043C	YLR187W
YDR043C	YLR417W
YDR043C	YNL192W
YDR043C	YNL231C
YDR043C	YNR060W
YDR043C	YOL014W
YDR043C	YOR317W
YDR043C	YPL145C
YDR043C	YPL176C
YDR043C	YPR157W
YDR123C	YAL053W
YDR123C	YAL054C
YDR123C	YBL106C
YDR123C	YBR029C
YDR123C	YBR030W
YDR123C	YCR057C
YDR123C	YDL049C
YDR123C	YDR073W
YDR123C	YDR124W
YDR123C	YDR147W
YDR123C	YDR169C
YDR123C	YDR312W
YDR123C	YDR497C
YDR123C	YER043C
YDR123C	YER091C
YDR123C	YGR238C
YDR123C	YHL020C
YDR123C	YHR082C
YDR123C	YJL048C
YDR123C	YJL141C
YDR123C	YJL149W
YDR123C	YJL151C
YDR123C	YJL153C
YDR123C	YJR105W
YDR123C	YKL182W
YDR123C	YML075C
YDR123C	YNL044W
YDR123C	YNL080C
YDR123C	YNL103W
YDR123C	YNL104C
YDR123C	YNL169C
YDR123C	YNL178W
YDR123C	YNL306W
YDR123C	YNR016C
YDR123C	YOR032C
YDR123C	YOR234C
YDR123C	YPL231W
YDR123C	YPL254W
YDR146C	YBR071W
YDR146C	YBR083W
YDR146C	YBR157C
YDR146C	YBR158W
YDR146C	YDL117W
YDR146C	YDL119C
YDR146C	YDL179W
YDR146C	YDL227C
YDR146C	YDR397C
YDR146C	YGR086C
YDR146C	YIL009W
YDR146C	YKL163W
YDR146C	YKL164C
YDR146C	YKL185W
YDR146C	YLR079W
YDR146C	YLR194C
YDR146C	YLR300W
YDR146C	YNL078W
YDR146C	YNL192W
YDR146C	YNL327W
YDR146C	YNL328C
YDR146C	YPL157W
YDR146C	YPL158C
YDR216W	YPL147W
YDR259C	YDR258C
YDR259C	YJR094C
YDR259C	YOL155C
YDR310C	YBR041W
YDR310C	YBR076W
YDR310C	YBR084W
YDR310C	YBR148W
YDR310C	YBR180W
YDR310C	YCL048W
YDR310C	YDL186W
YDR310C	YDR042C
YDR310C	YDR281C
YDR310C	YDR311W
YDR310C	YDR322W
YDR310C	YER106W
YDR310C	YFL040W
YDR310C	YFR011C
YDR310C	YFR012W
YDR310C	YFR023W
YDR310C	YFR032C
YDR310C	YGL138C
YDR310C	YGL170C
YDR310C	YGR059W
YDR310C	YGR256W
YDR310C	YGR258C
YDR310C	YGR260W
YDR310C	YHR124W
YDR310C	YHR184W
YDR310C	YHR185C
YDR310C	YIR027C
YDR310C	YIR028W
YDR310C	YJL043W
YDR310C	YJR025C
YDR310C	YJR078W
YDR310C	YKL178C
YDR310C	YKR015C
YDR310C	YLL005C
YDR310C	YLR082C
YDR310C	YLR308W
YDR310C	YMR272C
YDR310C	YNL202W
YDR310C	YNL204C
YDR310C	YNL318C
YDR310C	YOL102C
YDR310C	YOR255W
YDR310C	YOR365C
YDR310C	YPL075W
YDR310C	YPL239W
YDR421W	YHR137W
YDR463W	YAL001C
YDR463W	YBR043C
YDR463W	YCL025C
YDR463W	YDL130W-A
YDR463W	YDL199C
YDR463W	YDR046C
YDR463W	YDR077W
YDR463W	YDR101C
YDR463W	YDR144C
YDR463W	YDR145W
YDR463W	YDR508C
YDR463W	YDR510W
YDR463W	YEL046C
YDR463W	YGR055W
YDR463W	YJL198W
YDR463W	YJL200C
YDR463W	YJR013W
YDR463W	YJR109C
YDR463W	YKL161C
YDR463W	YLR094C
YDR463W	YOL007C
YDR463W	YOL117W
YDR463W	YOL119C
YDR463W	YOL125W
YDR463W	YOL126C
YDR463W	YOR221C
YDR463W	YOR222W
YDR463W	YOR273C
YDR463W	YOR274W
YDR463W	YPL253C
YDR463W	YPL265W
YDR463W	YPL273W
YDR520C	YBR137W
YDR520C	YER036C
YDR520C	YER037W
YDR520C	YHR128W
YEL009C	YBR068C
YEL009C	YBR147W
YEL009C	YBR256C
YEL009C	YCL030C
YEL009C	YDL066W
YEL009C	YDL170W
YEL009C	YDL198C
YEL009C	YDR035W
YEL009C	YDR127W
YEL009C	YEL063C
YEL009C	YER052C
YEL009C	YER073W
YEL009C	YGL009C
YEL009C	YGL026C
YEL009C	YGL059W
YEL009C	YGL125W
YEL009C	YGL180W
YEL009C	YGL184C
YEL009C	YGR052W
YEL009C	YGR065C
YEL009C	YGR161C
YEL009C	YHR018C
YEL009C	YHR029C
YEL009C	YHR071W
YEL009C	YIL056W
YEL009C	YIL116W
YEL009C	YIL117C
YEL009C	YIR017C
YEL009C	YIR034C
YEL009C	YJL088W
YEL009C	YJL130C
YEL009C	YJL200C
YEL009C	YJR025C
YEL009C	YJR109C
YEL009C	YKL103C
YEL009C	YLR267W
YEL009C	YMR062C
YEL009C	YMR095C
YEL009C	YMR096W
YEL009C	YMR136W
YEL009C	YMR195W
YEL009C	YNL104C
YEL009C	YNL239W
YEL009C	YNR069C
YEL009C	YOL058W
YEL009C	YOL117W
YEL009C	YOL119C
YEL009C	YOL140W
YEL009C	YOR222W
YEL009C	YPL111W
YEL009C	YPL135W
YEL009C	YPL250C
YEL009C	YPL264C
YEL009C	YPR144C
YEL009C	YPR145W
YER040W	YAL039C
YER040W	YAL040C
YER040W	YBR043C
YER040W	YBR157C
YER040W	YDL130W-A
YER040W	YDL170W
YER040W	YDL171C
YER040W	YDL181W
YER040W	YDL215C
YER040W	YDL237W
YER040W	YDL238C
YER040W	YDR031W
YER040W	YDR090C
YER040W	YER002W
YER040W	YER045C
YER040W	YER088C
YER040W	YGL006W
YER040W	YGR019W
YER040W	YGR060W
YER040W	YGR204W
YER040W	YGR234W
YER040W	YHL016C
YER040W	YHL028W
YER040W	YHR018C
YER040W	YHR029C
YER040W	YIR005W
YER040W	YIR027C
YER040W	YIR032C
YER040W	YIR033W
YER040W	YJL133W
YER040W	YJL172W
YER040W	YJL173C
YER040W	YJR148W
YER040W	YJR152W
YER040W	YKL062W
YER040W	YKL101W
YER040W	YKL103C
YER040W	YKR038C
YER040W	YKR039W
YER040W	YLL015W
YER040W	YLR023C
YER040W	YMR016C
YER040W	YNL141W
YER040W	YNR069C
YER040W	YOL058W
YER040W	YOL109W
YER040W	YOL117W
YER040W	YOL119C
YER040W	YOR230W
YER040W	YOR375C
YER040W	YOR377W
YER040W	YPL265W
YER040W	YPR035W
YER040W	YPR036W
YER040W	YPR144C
YER040W	YPR145W
YER111C	YBL002W
YER111C	YBL003C
YER111C	YBL023C
YER111C	YBL029C-A
YER111C	YBL030C
YER111C	YBR070C
YER111C	YBR071W
YER111C	YBR077C
YER111C	YBR078W
YER111C	YBR112C
YER111C	YBR162C
YER111C	YCR065W
YER111C	YDL047W
YER111C	YDL055C
YER111C	YDL126C
YER111C	YDL211C
YER111C	YDL227C
YER111C	YDR224C
YER111C	YDR225W
YER111C	YDR451C
YER111C	YDR507C
YER111C	YDR508C
YER111C	YDR525W-A
YER111C	YER001W
YER111C	YER010C
YER111C	YER011W
YER111C	YER112W
YER111C	YER145C
YER111C	YFR017C
YER111C	YGL038C
YER111C	YGL096W
YER111C	YGL253W
YER111C	YGR014W
YER111C	YGR109C
YER111C	YGR109W-A
YER111C	YGR109W-B
YER111C	YGR152C
YER111C	YGR153W
YER111C	YGR221C
YER111C	YHR061C
YER111C	YHR149C
YER111C	YHR205W
YER111C	YIL056W
YER111C	YIL123W
YER111C	YJL187C
YER111C	YJR048W
YER111C	YJR148W
YER111C	YKL007W
YER111C	YKL008C
YER111C	YKL043W
YER111C	YKL096W
YER111C	YKL096W-A
YER111C	YKL101W
YER111C	YKL103C
YER111C	YKR013W
YER111C	YKR042W
YER111C	YLR056W
YER111C	YLR084C
YER111C	YLR121C
YER111C	YLR254C
YER111C	YLR256W
YER111C	YML027W
YER111C	YMR016C
YER111C	YMR136W
YER111C	YMR179W
YER111C	YMR199W
YER111C	YMR305C
YER111C	YMR306W
YER111C	YNL231C
YER111C	YNL289W
YER111C	YNL298W
YER111C	YNR017W
YER111C	YNR018W
YER111C	YOL012C
YER111C	YOL113W
YER111C	YOL114C
YER111C	YOR246C
YER111C	YOR247W
YER111C	YPL016W
YER111C	YPL017C
YER111C	YPL124W
YER111C	YPL127C
YER111C	YPL163C
YER111C	YPL267W
YER111C	YPR119W
YER111C	YPR148C
YER111C	YPR149W
YER161C	YBL091C-A
YER161C	YBR159W
YER161C	YHR175W
YER161C	YLR043C
YER161C	YLR354C
YER161C	YNL066W
YER161C	YOL041C
YER161C	YOL086W-A
YER161C	YOL154W
YER161C	YOL155C
YER161C	YOR236W
YER161C	YPL252C
YFL031W	YOL031C
YFR034C	YML123C
YGL035C	YDR441C
YGL035C	YOL156W
YGL131C	YAL039C
YGL131C	YBR138C
YGL131C	YBR145W
YGL131C	YCR091W
YGL131C	YHR138C
YGL131C	YJL093C
YGL131C	YNL182C
YGL131C	YPR104C
YGL131C	YPR158W
YGL237C	YBL099W
YGL237C	YBR039W
YGL237C	YDL067C
YGL237C	YDL170W
YGL237C	YDL181W
YGL237C	YDR210W
YGL237C	YDR377W
YGL237C	YDR529C
YGL237C	YEL024W
YGL237C	YEL047C
YGL237C	YER174C
YGL237C	YFR033C
YGL237C	YGL187C
YGL237C	YGR084C
YGL237C	YGR233C
YGL237C	YGR234W
YGL237C	YGR243W
YGL237C	YHR001W-A
YGL237C	YHR051W
YGL237C	YJL011C
YGL237C	YJL148W
YGL237C	YJL198W
YGL237C	YJR077C
YGL237C	YLL015W
YGL237C	YLR220W
YGL237C	YLR368W
YGL237C	YMR256C
YGL237C	YNL050C
YGL237C	YOL077W-A
YGL237C	YOL154W
YGL237C	YOR375C
YGL237C	YOR377W
YGL237C	YPL019C
YGL237C	YPL207W
YGL237C	YPR145W
YGR044C	YDR528W
YGR044C	YGL135W
YGR044C	YGR256W
YGR044C	YNR018W
YGR044C	YOL155C
YHL020C	YCR005C
YHL020C	YGR106C
YHL020C	YIL134W
YHL020C	YJL153C
YHL020C	YKL182W
YHL020C	YOR271C
YHL020C	YOR272W
YHL020C	YPR001W
YHL020C	YPR159W
YHL020C	YPR171W
YHR084W	YBL016W
YHR084W	YBL086C
YHR084W	YBR040W
YHR084W	YBR083W
YHR084W	YBR156C
YHR084W	YBR158W
YHR084W	YCL027W
YHR084W	YCL055W
YHR084W	YDL089W
YHR084W	YDL090C
YHR084W	YDL240W
YHR084W	YDR085C
YHR084W	YDR249C
YHR084W	YDR309C
YHR084W	YER155C
YHR084W	YGL162W
YHR084W	YGR014W
YHR084W	YGR108W
YHR084W	YGR189C
YHR084W	YGR221C
YHR084W	YGR234W
YHR084W	YHR005C
YHR084W	YHR152W
YHR084W	YIL037C
YHR084W	YIL117C
YHR084W	YJR054W
YHR084W	YKL189W
YHR084W	YKR013W
YHR084W	YKR091W
YHR084W	YLR452C
YHR084W	YML046W
YHR084W	YML047C
YHR084W	YMR236W
YHR084W	YMR244C-A
YHR084W	YMR305C
YHR084W	YNL192W
YHR084W	YNL208W
YHR084W	YNR044W
YHR084W	YOR066W
YHR084W	YOR247W
YHR084W	YPL048W
YHR084W	YPL049C
YHR084W	YPL156C
YHR084W	YPL163C
YHR084W	YPR005C
YHR084W	YPR122W
YHR178W	YDL049C
YHR178W	YDL235C
YHR178W	YDR011W
YHR178W	YDR231C
YHR178W	YDR232W
YHR178W	YDR248C
YHR178W	YDR294C
YHR178W	YEL041W
YHR178W	YHR161C
YHR178W	YHR162W
YHR178W	YHR163W
YHR178W	YHR183W
YHR178W	YIL159W
YHR178W	YIL160C
YHR178W	YLR354C
YHR178W	YMR315W
YHR178W	YNL273W
YHR178W	YNL274C
YHR178W	YPL061W
YHR206W	YBL029C-A
YHR206W	YBR054W
YHR206W	YBR157C
YHR206W	YCR073C
YHR206W	YDL049C
YHR206W	YDR007W
YHR206W	YDR044W
YHR206W	YDR297W
YHR206W	YDR309C
YHR206W	YDR353W
YHR206W	YEL044W
YHR206W	YER001W
YHR206W	YER011W
YHR206W	YER185W
YHR206W	YGL038C
YHR206W	YGR052W
YHR206W	YGR086C
YHR206W	YGR279C
YHR206W	YHR030C
YHR206W	YIL119C
YHR206W	YJL105W
YHR206W	YJL116C
YHR206W	YJR104C
YHR206W	YKL062W
YHR206W	YKL086W
YHR206W	YKL087C
YHR206W	YKR042W
YHR206W	YKR052C
YHR206W	YLL019C
YHR206W	YLR205C
YHR206W	YLR257W
YHR206W	YLR258W
YHR206W	YLR304C
YHR206W	YLR413W
YHR206W	YML028W
YHR206W	YML052W
YHR206W	YML100W
YHR206W	YMR145C
YHR206W	YMR173W
YHR206W	YMR199W
YHR206W	YMR305C
YHR206W	YNL173C
YHR206W	YNR018W
YHR206W	YOL052C-A
YHR206W	YOL058W
YHR206W	YOL059W
YHR206W	YOR226C
YHR206W	YPR009W
YHR206W	YPR013C
YHR206W	YPR065W
YHR206W	YPR149W
YIL036W	YBL018C
YIL036W	YBR013C
YIL036W	YBR110W
YIL036W	YBR168W
YIL036W	YBR229C
YIL036W	YDR028C
YIL036W	YDR045C
YIL036W	YDR067C
YIL036W	YDR068W
YIL036W	YDR372C
YIL036W	YDR373W
YIL036W	YDR393W
YIL036W	YHR171W
YIL036W	YKL077W
YIL036W	YLR022C
YIL036W	YMR258C
YIL036W	YNL001W
YIL036W	YNL002C
YIL036W	YOR234C
YIL036W	YPR081C
YIL131C	YBR139W
YIL131C	YBR158W
YIL131C	YCL064C
YIL131C	YCR075C
YIL131C	YDR113C
YIL131C	YDR115W
YIL131C	YDR263C
YIL131C	YDR488C
YIL131C	YER070W
YIL131C	YER124C
YIL131C	YER125W
YIL131C	YGL028C
YIL131C	YGL256W
YIL131C	YGR092W
YIL131C	YGR099W
YIL131C	YHR084W
YIL131C	YHR094C
YIL131C	YJR112W
YIL131C	YKR054C
YIL131C	YLR209C
YIL131C	YLR210W
YIL131C	YLR286C
YIL131C	YLR300W
YIL131C	YMR078C
YIL131C	YMR198W
YIL131C	YMR215W
YIL131C	YNL104C
YIL131C	YPL116W
YIL131C	YPL177C
YIL131C	YPL227C
YJL056C	YJL055W
YJL056C	YLR130C
YJL089W	YER065C
YJR060W	YAL012W
YJR060W	YAL026C
YJR060W	YAL053W
YJR060W	YAL054C
YJR060W	YBR015C
YJR060W	YBR039W
YJR060W	YBR049C
YJR060W	YBR143C
YJR060W	YBR145W
YJR060W	YBR249C
YJR060W	YBR250W
YJR060W	YBR255C-A
YJR060W	YCR087C-A
YJR060W	YCR088W
YJR060W	YCR092C
YJR060W	YCR093W
YJR060W	YDL006W
YJR060W	YDL020C
YJR060W	YDL051W
YJR060W	YDL059C
YJR060W	YDL074C
YJR060W	YDR054C
YJR060W	YDR055W
YJR060W	YDR141C
YJR060W	YDR267C
YJR060W	YDR297W
YJR060W	YDR381C-A
YJR060W	YDR382W
YJR060W	YDR530C
YJR060W	YDR531W
YJR060W	YEL024W
YJR060W	YEL043W
YJR060W	YEL046C
YJR060W	YER001W
YJR060W	YER043C
YJR060W	YER045C
YJR060W	YER062C
YJR060W	YER063W
YJR060W	YER071C
YJR060W	YER094C
YJR060W	YER099C
YJR060W	YER114C
YJR060W	YER124C
YJR060W	YER177W
YJR060W	YFL018C
YJR060W	YFL023W
YJR060W	YFL024C
YJR060W	YFL031W
YJR060W	YFL033C
YJR060W	YFR030W
YJR060W	YFR049W
YJR060W	YGR052W
YJR060W	YGR060W
YJR060W	YGR154C
YJR060W	YGR155W
YJR060W	YGR200C
YJR060W	YGR204W
YJR060W	YGR223C
YJR060W	YGR230W
YJR060W	YGR234W
YJR060W	YHR001W-A
YJR060W	YHR033W
YJR060W	YHR042W
YJR060W	YHR083W
YJR060W	YHR089C
YJR060W	YHR099W
YJR060W	YHR112C
YJR060W	YHR113W
YJR060W	YHR136C
YJR060W	YHR137W
YJR060W	YIL033C
YJR060W	YIL088C
YJR060W	YIL118W
YJR060W	YIL119C
YJR060W	YIL126W
YJR060W	YIL127C
YJR060W	YIR006C
YJR060W	YIR007W
YJR060W	YIR017C
YJR060W	YJL101C
YJR060W	YJL109C
YJR060W	YJL116C
YJR060W	YJL149W
YJR060W	YJL166W
YJR060W	YJL167W
YJR060W	YJL168C
YJR060W	YJL186W
YJR060W	YJL187C
YJR060W	YJL209W
YJR060W	YJR009C
YJR060W	YJR010W
YJR060W	YJR095W
YJR060W	YJR137C
YJR060W	YJR138W
YJR060W	YJR147W
YJR060W	YKL016C
YJR060W	YKL139W
YJR060W	YKL191W
YJR060W	YKL192C
YJR060W	YKR072C
YJR060W	YKR074W
YJR060W	YLR081W
YJR060W	YLR092W
YJR060W	YLR409C
YJR060W	YLR410W
YJR060W	YML017W
YJR060W	YML119W
YJR060W	YML120C
YJR060W	YML123C
YJR060W	YMR195W
YJR060W	YMR196W
YJR060W	YMR197C
YJR060W	YMR198W
YJR060W	YMR217W
YJR060W	YMR301C
YJR060W	YMR308C
YJR060W	YNL036W
YJR060W	YNL037C
YJR060W	YNL063W
YJR060W	YNL095C
YJR060W	YNL103W
YJR060W	YNL104C
YJR060W	YNL220W
YJR060W	YNL259C
YJR060W	YNL260C
YJR060W	YNL277W
YJR060W	YNL283C
YJR060W	YNR013C
YJR060W	YNR014W
YJR060W	YNR051C
YJR060W	YOL011W
YJR060W	YOL064C
YJR060W	YOL101C
YJR060W	YOR064C
YJR060W	YOR065W
YJR060W	YOR098C
YJR060W	YOR099W
YJR060W	YOR299W
YJR060W	YOR327C
YJR060W	YOR375C
YJR060W	YOR377W
YJR060W	YPL018W
YJR060W	YPL019C
YJR060W	YPL206C
YJR060W	YPL235W
YJR060W	YPL236C
YJR060W	YPL250C
YJR060W	YPL254W
YJR094C	YBR016W
YKL015W	YHR037W
YKL015W	YOR306C
YKL020C	YER044C-A
YKL020C	YJR011C
YKL020C	YKL067W
YKL032C	YDR441C
YKL032C	YIL118W
YKL032C	YIL119C
YKL032C	YKR075C
YKL032C	YKR076W
YKL038W	YER028C
YKL038W	YHR094C
YKL062W	YKL051W
YKL062W	YML100W
YKL062W	YMR119W
YKL062W	YPL017C
YKL109W	YBL030C
YKL109W	YBL045C
YKL109W	YBL099W
YKL109W	YBR039W
YKL109W	YDL004W
YKL109W	YDL067C
YKL109W	YDL181W
YKL109W	YDR148C
YKL109W	YDR322C-A
YKL109W	YDR377W
YKL109W	YDR529C
YKL109W	YEL024W
YKL109W	YFR033C
YKL109W	YGL187C
YKL109W	YGL191W
YKL109W	YHR001W-A
YKL109W	YHR051W
YKL109W	YKL016C
YKL109W	YKL148C
YKL109W	YLR038C
YKL109W	YLR295C
YKL109W	YLR395C
YKL109W	YMR256C
YKL109W	YNL052W
YKL109W	YOL077W-A
YKL109W	YOR064C
YKL109W	YOR065W
YKL109W	YOR187W
YKL109W	YPR020W
YKL185W	YDR055W
YKL185W	YIL122W
YKL185W	YJL159W
YKL185W	YJL194W
YKL185W	YKL186C
YKL185W	YMR122W-A
YKR034W	YLR363W-A
YKR099W	YAL044C
YKR099W	YAL060W
YKR099W	YCL030C
YKR099W	YDR019C
YKR099W	YDR408C
YKR099W	YER091C
YKR099W	YGL184C
YKR099W	YGL186C
YKR099W	YGL234W
YKR099W	YGL236C
YKR099W	YGR061C
YKR099W	YGR204W
YKR099W	YKL218C
YKR099W	YKR080W
YKR099W	YLR058C
YKR099W	YLR359W
YKR099W	YMR120C
YKR099W	YMR188C
YKR099W	YMR189W
YKR099W	YMR244W
YKR099W	YMR300C
YKR099W	YNL220W
YKR099W	YOR128C
YLR098C	YCL063W
YLR098C	YCL064C
YLR131C	YAL040C
YLR131C	YBR158W
YLR131C	YBR162C
YLR131C	YDL055C
YLR131C	YDL127W
YLR131C	YDR155C
YLR131C	YER124C
YLR131C	YER125W
YLR131C	YER177W
YLR131C	YGL008C
YLR131C	YGL028C
YLR131C	YGL229C
YLR131C	YGR041W
YLR131C	YIL009C-A
YLR131C	YIL009W
YLR131C	YJR147W
YLR131C	YJR148W
YLR131C	YKL150W
YLR131C	YKL151C
YLR131C	YLR286C
YLR131C	YMR251W-A
YLR131C	YMR262W
YLR131C	YNL078W
YLR131C	YNL327W
YLR131C	YNR018W
YLR176C	YGR180C
YLR176C	YIL066C
YLR176C	YLR286C
YLR176C	YMR177W
YLR176C	YMR279C
YLR176C	YOR280C
YLR182W	YBL029C-A
YLR182W	YBL029W
YLR182W	YBL030C
YLR182W	YBR070C
YLR182W	YBR071W
YLR182W	YBR077C
YLR182W	YCL054W
YLR182W	YCR065W
YLR182W	YDL003W
YLR182W	YDL017W
YLR182W	YDL018C
YLR182W	YDL055C
YLR182W	YDL101C
YLR182W	YDL127W
YLR182W	YDL211C
YLR182W	YDL227C
YLR182W	YDR113C
YLR182W	YDR115W
YLR182W	YDR224C
YLR182W	YDR225W
YLR182W	YDR263C
YLR182W	YDR309C
YLR182W	YDR451C
YLR182W	YDR524C
YLR182W	YDR525W-A
YLR182W	YDR527W
YLR182W	YDR528W
YLR182W	YEL001C
YLR182W	YEL040W
YLR182W	YER001W
YLR182W	YER070W
YLR182W	YER094C
YLR182W	YER095W
YLR182W	YER111C
YLR182W	YER112W
YLR182W	YGL038C
YLR182W	YGL178W
YLR182W	YGL179C
YLR182W	YGL253W
YLR182W	YGR109C
YLR182W	YGR109W-A
YLR182W	YGR109W-B
YLR182W	YGR153W
YLR182W	YGR180C
YLR182W	YGR189C
YLR182W	YGR221C
YLR182W	YGR279C
YLR182W	YHR149C
YLR182W	YHR150W
YLR182W	YHR152W
YLR182W	YIL026C
YLR182W	YIL056W
YLR182W	YIL123W
YLR182W	YJL092W
YLR182W	YJL093C
YLR182W	YJL115W
YLR182W	YJL116C
YLR182W	YJL194W
YLR182W	YJL196C
YLR182W	YJR054W
YLR182W	YJR145C
YLR182W	YJR147W
YLR182W	YKL007W
YLR182W	YKL008C
YLR182W	YKL043W
YLR182W	YKL067W
YLR182W	YKL096W
YLR182W	YKL096W-A
YLR182W	YKL112W
YLR182W	YKL113C
YLR182W	YKR013W
YLR182W	YKR042W
YLR182W	YLR055C
YLR182W	YLR056W
YLR182W	YLR103C
YLR182W	YLR332W
YLR182W	YLR342W
YLR182W	YLR438C-A
YLR182W	YLR438W
YLR182W	YML027W
YLR182W	YML100W
YLR182W	YML101C
YLR182W	YMR016C
YLR182W	YMR070W
YLR182W	YMR135C
YLR182W	YMR136W
YLR182W	YMR179W
YLR182W	YMR199W
YLR182W	YMR215W
YLR182W	YMR305C
YLR182W	YMR306W
YLR182W	YNL231C
YLR182W	YNL273W
YLR182W	YNL274C
YLR182W	YNL289W
YLR182W	YNL298W
YLR182W	YNR009W
YLR182W	YNR018W
YLR182W	YNR044W
YLR182W	YOL113W
YLR182W	YOR074C
YLR182W	YOR075W
YLR182W	YOR236W
YLR182W	YOR246C
YLR182W	YOR372C
YLR182W	YOR373W
YLR182W	YPL126W
YLR182W	YPL127C
YLR182W	YPL163C
YLR182W	YPL255W
YLR182W	YPL256C
YLR182W	YPR009W
YLR182W	YPR119W
YLR182W	YPR120C
YLR182W	YPR121W
YLR182W	YPR159W
YLR256W	YDR527W
YLR256W	YEL038W
YLR256W	YER044C
YLR256W	YER048C
YLR256W	YGR035C
YLR256W	YGR234W
YLR256W	YHR007C
YLR256W	YJL048C
YLR256W	YJR047C
YLR256W	YJR048W
YLR256W	YKR046C
YLR256W	YLR254C
YLR256W	YML036W
YLR256W	YML054C
YLR256W	YML075C
YLR256W	YML126C
YLR256W	YMR201C
YLR256W	YNL111C
YLR256W	YOL109W
YLR256W	YOR065W
YLR256W	YOR356W
YLR256W	YPL116W
YLR256W	YPL218W
YLR403W	YAL003W
YLR403W	YBR085W
YLR403W	YBR188C
YLR403W	YDL076C
YLR403W	YDL083C
YLR403W	YDL130W
YLR403W	YDR064W
YLR403W	YDR077W
YLR403W	YDR447C
YLR403W	YER116C
YLR403W	YGL103W
YLR403W	YGL104C
YLR403W	YHR021C
YLR403W	YHR021W-A
YLR403W	YLR042C
YLR403W	YLR448W
YLR403W	YML024W
YLR403W	YML064C
YLR403W	YNL069C
YLR403W	YNL096C
YLR403W	YNL162W-A
YLR403W	YNL163C
YLR403W	YNL288W
YLR403W	YOL121C
YLR403W	YOR032C
YLR403W	YOR234C
YLR403W	YOR312C
YLR403W	YPL029W
YLR403W	YPL090C
YLR451W	YBL029C-A
YLR451W	YBL029W
YLR451W	YBR068C
YLR451W	YGL009C
YLR451W	YJR016C
YLR451W	YKL120W
YLR451W	YNL104C
YLR451W	YOR108W
YML007W	YDR533C
YML007W	YGR060W
YML007W	YGR209C
YML007W	YJL101C
YML007W	YJR104C
YML007W	YJR122W
YML007W	YKL086W
YML007W	YKR052C
YML007W	YKR071C
YML007W	YLL058W
YML007W	YML116W
YML007W	YMR318C
YML007W	YNL134C
YML007W	YOL119C
YML027W	YDR191W
YML027W	YEL032W
YML027W	YGR092W
YML027W	YLR273C
YML027W	YLR274W
YML051W	YBR019C
YML051W	YBR020W
YML099C	YER069W
YML099C	YFL023W
YML099C	YJL088W
YML099C	YOL058W
YML099C	YOL140W
YMR016C	YAL061W
YMR016C	YBL029C-A
YMR016C	YBL029W
YMR016C	YBL043W
YMR016C	YBR066C
YMR016C	YBR092C
YMR016C	YBR114W
YMR016C	YDL048C
YMR016C	YDR216W
YMR016C	YDR441C
YMR016C	YEL040W
YMR016C	YEL066W
YMR016C	YER001W
YMR016C	YER011W
YMR016C	YER033C
YMR016C	YER034W
YMR016C	YER044C
YMR016C	YER045C
YMR016C	YER145C
YMR016C	YER158C
YMR016C	YGL008C
YMR016C	YGL158W
YMR016C	YGR060W
YMR016C	YGR086C
YMR016C	YGR238C
YMR016C	YGR249W
YMR016C	YGR279C
YMR016C	YIL119C
YMR016C	YIL122W
YMR016C	YJL105W
YMR016C	YJR127C
YMR016C	YKL043W
YMR016C	YKL062W
YMR016C	YLR300W
YMR016C	YLR342W
YMR016C	YMR017W
YMR016C	YMR056C
YMR016C	YMR058W
YMR016C	YMR122W-A
YMR016C	YMR136W
YMR016C	YMR199W
YMR016C	YMR319C
YMR016C	YNL180C
YMR016C	YOR028C
YMR016C	YOR152C
YMR016C	YOR153W
YMR016C	YOR178C
YMR016C	YOR317W
YMR016C	YPL024W
YMR016C	YPL026C
YMR016C	YPL177C
YMR016C	YPL230W
YMR016C	YPL256C
YMR016C	YPR013C
YMR019W	YBR046C
YMR019W	YBR047W
YMR019W	YBR222C
YMR019W	YEL020C
YMR019W	YIL166C
YMR019W	YPR128C
YMR021C	YER145C
YMR021C	YIL117C
YMR021C	YKL062W
YMR021C	YOL154W
YMR021C	YPL177C
YMR021C	YPR124W
YMR037C	YAL060W
YMR037C	YBR085C-A
YMR037C	YBR151W
YMR037C	YDR171W
YMR037C	YDR177W
YMR037C	YDR453C
YMR037C	YER177W
YMR037C	YGR008C
YMR037C	YGR052W
YMR037C	YGR086C
YMR037C	YGR088W
YMR037C	YGR256W
YMR037C	YIL056W
YMR037C	YJL048C
YMR037C	YKL085W
YMR037C	YKL096W
YMR037C	YKL103C
YMR037C	YKR066C
YMR037C	YLR257W
YMR037C	YLR258W
YMR037C	YLR413W
YMR037C	YML028W
YMR037C	YML100W
YMR037C	YMR090W
YMR037C	YMR173W
YMR037C	YMR175W
YMR037C	YMR251W-A
YMR037C	YNL007C
YMR037C	YNL160W
YMR037C	YOL052C-A
YMR037C	YOR273C
YMR037C	YPL137C
YMR037C	YPR149W
YMR037C	YPR160W
YMR042W	YER069W
YMR042W	YFL023W
YMR042W	YHR179W
YMR042W	YJL088W
YMR042W	YKL060C
YMR042W	YML098W
YMR042W	YML099C
YMR042W	YOL140W
YMR042W	YOR317W
YMR070W	YAL060W
YMR070W	YBR185C
YMR070W	YDR440W
YMR070W	YDR441C
YMR070W	YEL060C
YMR070W	YER045C
YMR070W	YER149C
YMR070W	YGR249W
YMR070W	YHL028W
YMR070W	YHR047C
YMR070W	YKR042W
YMR070W	YNL173C
YMR070W	YOL109W
YMR070W	YPL135W
YMR070W	YPR065W
YMR070W	YPR149W
YMR070W	YPR154W
YMR070W	YPR184W
YNL068C	YAL024C
YNL068C	YBR049C
YNL068C	YBR053C
YNL068C	YBR054W
YNL068C	YBR077C
YNL068C	YBR078W
YNL068C	YBR092C
YNL068C	YBR138C
YNL068C	YBR139W
YNL068C	YCL054W
YNL068C	YCL063W
YNL068C	YCR075C
YNL068C	YDL101C
YNL068C	YDR032C
YNL068C	YDR033W
YNL068C	YDR077W
YNL068C	YDR113C
YNL068C	YER070W
YNL068C	YER095W
YNL068C	YFR003C
YNL068C	YGL021W
YNL068C	YGL028C
YNL068C	YGL256W
YNL068C	YGR098C
YNL068C	YGR099W
YNL068C	YGR143W
YNL068C	YHL024W
YNL068C	YHL028W
YNL068C	YHR031C
YNL068C	YHR152W
YNL068C	YIL131C
YNL068C	YKL008C
YNL068C	YKR031C
YNL068C	YLR209C
YNL068C	YLR210W
YNL068C	YLR360W
YNL068C	YLR399C
YNL068C	YML052W
YNL068C	YML064C
YNL068C	YML124C
YNL068C	YMR117C
YNL068C	YMR163C
YNL068C	YMR183C
YNL068C	YMR184W
YNL068C	YMR198W
YNL068C	YNL056W
YNL068C	YNL058C
YNL068C	YNL091W
YNL068C	YOR230W
YNL068C	YOR233W
YNL068C	YOR246C
YNL068C	YOR247W
YNL068C	YOR372C
YNL068C	YOR373W
YNL068C	YPL015C
YNL068C	YPL116W
YNL068C	YPL242C
YNL068C	YPR033C
YNL068C	YPR119W
YNL068C	YPR149W
YNL068C	YPR157W
YNL167C	YBL030C
YNL167C	YDR077W
YNL167C	YEL066W
YNL167C	YGL006W
YNL167C	YGR243W
YNL167C	YGR249W
YNL167C	YHR033W
YNL167C	YHR049W
YNL167C	YHR096C
YNL167C	YJL106W
YNL167C	YJL107C
YNL167C	YKL096W
YNL167C	YMR136W
YNL167C	YOR349W
YNL167C	YPR005C
YNL199C	YAL038W
YNL199C	YAL039C
YNL199C	YBR145W
YNL199C	YDL049C
YNL199C	YDR050C
YNL199C	YDR508C
YNL199C	YDR510W
YNL199C	YDR528W
YNL199C	YEL044W
YNL199C	YER091C
YNL199C	YER177W
YNL199C	YGL062W
YNL199C	YGL134W
YNL199C	YGR060W
YNL199C	YGR078C
YNL199C	YHL015W
YNL199C	YHL016C
YNL199C	YHR174W
YNL199C	YJL004C
YNL199C	YJL148W
YNL199C	YJL194W
YNL199C	YJL196C
YNL199C	YJR009C
YNL199C	YJR010W
YNL199C	YKL060C
YNL199C	YKL152C
YNL199C	YLR264W
YNL199C	YLR343W
YNL199C	YMR014W
YNL199C	YMR205C
YNL199C	YNL066W
YNL199C	YNR050C
YNL199C	YOL041C
YNL199C	YOL084W
YNL199C	YOR138C
YNL199C	YPR120C
YNL199C	YPR121W
YNL314W	YDR032C
YNL314W	YIR026C
YNL314W	YIR027C
YNL314W	YIR028W
YNL314W	YIR030C
YNL314W	YLR438W
YOL028C	YGR234W
YOL108C	YBL106C
YOL108C	YBR029C
YOL108C	YBR030W
YOL108C	YBR085C-A
YOL108C	YBR143C
YOL108C	YBR145W
YOL108C	YCR034W
YOL108C	YCR057C
YOL108C	YDL049C
YOL108C	YDR129C
YOL108C	YDR147W
YOL108C	YDR438W
YOL108C	YDR497C
YOL108C	YER026C
YOL108C	YER043C
YOL108C	YER091C
YOL108C	YER092W
YOL108C	YFR015C
YOL108C	YGL077C
YOL108C	YGR157W
YOL108C	YGR238C
YOL108C	YHL007C
YOL108C	YHR123W
YOL108C	YJL048C
YOL108C	YJL140W
YOL108C	YJL141C
YOL108C	YJL153C
YOL108C	YJL168C
YOL108C	YJR105W
YOL108C	YJR127C
YOL108C	YKL182W
YOL108C	YLR132C
YOL108C	YLR133W
YOL108C	YMR135C
YOL108C	YMR186W
YOL108C	YMR307W
YOL108C	YNL044W
YOL108C	YNL090W
YOL108C	YNL169C
YOL108C	YNR016C
YOL108C	YNR017W
YOL108C	YOR230W
YOL108C	YOR234C
YOL108C	YPL231W
YOL108C	YPR013C
YOL108C	YPR115W
YOR028C	YBR072W
YOR028C	YDR032C
YOR028C	YDR300C
YOR028C	YDR338C
YOR028C	YDR441C
YOR028C	YEL046C
YOR028C	YER028C
YOR028C	YER045C
YOR028C	YFL004W
YOR028C	YGR234W
YOR028C	YGR238C
YOR028C	YIR038C
YOR028C	YJR133W
YOR028C	YJR147W
YOR028C	YKL072W
YOR028C	YKL110C
YOR028C	YLL054C
YOR028C	YLR413W
YOR028C	YMR173W
YOR028C	YMR177W
YOR028C	YMR244C-A
YOR028C	YMR246W
YOR028C	YNL087W
YOR028C	YNL180C
YOR028C	YNL217W
YOR028C	YOL052C-A
YOR028C	YOR011W
YOR028C	YPR065W
YOR028C	YPR122W
YOR028C	YPR149W
YOR113W	YBR230C
YOR113W	YIL056W
YOR113W	YLR023C
YOR113W	YNR050C
YOR358W	YBL099W
YOR358W	YDL048C
YOR358W	YDL181W
YOR358W	YDR077W
YOR358W	YDR529C
YOR358W	YFR033C
YOR358W	YGL187C
YOR358W	YGR234W
YOR358W	YHR051W
YOR358W	YLL027W
YOR358W	YPL207W
YOR358W	YPR144C
YOR358W	YPR145W
YPL038W	YDL059C
YPL038W	YDL061C
YPL038W	YDR502C
YPL038W	YER092W
YPL038W	YJL210W
YPL038W	YJL212C
YPL038W	YJR137C
YPL038W	YLR179C
YPL038W	YLR180W
YPL038W	YNL191W
YPL038W	YPR167C
YPL049C	YAR014C
YPL049C	YAR015W
YPL049C	YBL004W
YPL049C	YBL016W
YPL049C	YBL023C
YPL049C	YBL061C
YPL049C	YBR040W
YPL049C	YBR060C
YPL049C	YBR082C
YPL049C	YBR083W
YPL049C	YBR205W
YPL049C	YCL027W
YPL049C	YCL055W
YPL049C	YCR089W
YPL049C	YDL127W
YPL049C	YDR085C
YPL049C	YDR211W
YPL049C	YDR281C
YPL049C	YDR309C
YPL049C	YDR378C
YPL049C	YDR379W
YPL049C	YDR465C
YPL049C	YDR466W
YPL049C	YEL019C
YPL049C	YER095W
YPL049C	YER118C
YPL049C	YER155C
YPL049C	YFL026W
YPL049C	YFL027C
YPL049C	YGL062W
YPL049C	YGL097W
YPL049C	YGL116W
YPL049C	YGR014W
YPL049C	YGR032W
YPL049C	YGR108W
YPL049C	YGR165W
YPL049C	YGR233C
YPL049C	YGR234W
YPL049C	YHR005C-A
YPL049C	YHR072W
YPL049C	YHR082C
YPL049C	YHR083W
YPL049C	YIL015W
YPL049C	YIL096C
YPL049C	YIL123W
YPL049C	YJL051W
YPL049C	YJL187C
YPL049C	YJR075W
YPL049C	YKL043W
YPL049C	YKL095W
YPL049C	YKL096W
YPL049C	YKL096W-A
YPL049C	YKL104C
YPL049C	YKL189W
YPL049C	YKL208W
YPL049C	YKR013W
YPL049C	YKR041W
YPL049C	YKR091W
YPL049C	YLR084C
YPL049C	YLR110C
YPL049C	YLR113W
YPL049C	YLR275W
YPL049C	YLR332W
YPL049C	YLR353W
YPL049C	YLR452C
YPL049C	YLR454W
YPL049C	YML047C
YPL049C	YML124C
YPL049C	YMR065W
YPL049C	YMR119W
YPL049C	YMR136W
YPL049C	YMR164C
YPL049C	YMR199W
YPL049C	YMR232W
YPL049C	YMR235C
YPL049C	YMR236W
YPL049C	YMR306W
YPL049C	YNL053W
YPL049C	YNL087W
YPL049C	YNL152W
YPL049C	YNL153C
YPL049C	YNL160W
YPL049C	YNL272C
YPL049C	YNL279W
YPL049C	YNL280C
YPL049C	YNL289W
YPL049C	YNL298W
YPL049C	YNR028W
YPL049C	YNR054C
YPL049C	YOL082W
YPL049C	YOR159C
YPL049C	YOR236W
YPL049C	YPL048W
YPL049C	YPL156C
YPL049C	YPL163C
YPL049C	YPL177C
YPL049C	YPL192C
YPL049C	YPR005C
YPL049C	YPR060C
YPL049C	YPR075C
YPL049C	YPR119W
YPL049C	YPR121W
YPL049C	YPR135W
YPL049C	YPR171W
YPL089C	YJL106W
YPL089C	YKL096W
YPL089C	YKL161C
YPL089C	YKR091W
YPL089C	YLR300W
YPR065W	YBL029C-A
YPR065W	YBL029W
YPR065W	YCR073C
YPR065W	YCR073W-A
YPR065W	YDR077W
YPR065W	YDR525W-A
YPR065W	YEL047C
YPR065W	YER150W
YPR065W	YFR022W
YPR065W	YGR052W
YPR065W	YGR146C
YPR065W	YGR161C
YPR065W	YGR233C
YPR065W	YGR255C
YPR065W	YGR256W
YPR065W	YIL056W
YPR065W	YIL119C
YPR065W	YJL048C
YPR065W	YKL109W
YPR065W	YKL120W
YPR065W	YLR256W
YPR065W	YLR297W
YPR065W	YLR368W
YPR065W	YMR136W
YPR065W	YNL134C
YPR065W	YNL178W
YPR065W	YOR032C
YPR065W	YPR063C
YPR065W	YPR148C
YPR199C	YCL054W

## Sheet: Gold_standard_network3
Transcription factor	Direct regulatory targets of that transcription factor
YBL005W	YBL006C
YBL021C	YBR039W
YBL021C	YDL171C
YBL021C	YDR377W
YBL021C	YER174C
YBL021C	YER175C
YBL021C	YFR023W
YBL021C	YGL187C
YBL021C	YGR234W
YBL021C	YHR001W-A
YBL021C	YHR051W
YBL021C	YJR077C
YBL021C	YLL027W
YBL021C	YLR220W
YBL021C	YML119W
YBL021C	YML120C
YBL021C	YOL159C
YBL021C	YOR112W
YBL021C	YPL207W
YBL103C	YBL015W
YBL103C	YBL043W
YBL103C	YBR248C
YBL103C	YCL030C
YBL103C	YDL066W
YBL103C	YDL170W
YBL103C	YDL171C
YBL103C	YDL182W
YBL103C	YDR098C-B
YBL103C	YDR127W
YBL103C	YDR508C
YBL103C	YEL071W
YBL103C	YEL073C
YBL103C	YGL027C
YBL103C	YGL255W
YBL103C	YGR052W
YBL103C	YGR060W
YBL103C	YGR142W
YBL103C	YHR018C
YBL103C	YHR071W
YBL103C	YHR162W
YBL103C	YIL056W
YBL103C	YIL083C
YBL103C	YJL088W
YBL103C	YJL217W
YBL103C	YJR109C
YBL103C	YJR148W
YBL103C	YJR152W
YBL103C	YKL109W
YBL103C	YKR093W
YBL103C	YLR130C
YBL103C	YLR267W
YBL103C	YLR304C
YBL103C	YMR251W-A
YBL103C	YNL036W
YBL103C	YNL037C
YBL103C	YNL134C
YBL103C	YNL231C
YBL103C	YNL278W
YBL103C	YNR001C
YBL103C	YOR136W
YBL103C	YPL135W
YBL103C	YPL250C
YBL103C	YPL252C
YBL103C	YPL265W
YBR083W	YAR015W
YBR083W	YBL016W
YBR083W	YCL027W
YBR083W	YDR098C-B
YBR083W	YDR262W
YBR083W	YDR309C
YBR083W	YER118C
YBR083W	YER155C
YBR083W	YGR014W
YBR083W	YGR040W
YBR083W	YIL119C
YBR083W	YKL096W
YBR083W	YKR039W
YBR083W	YKR091W
YBR083W	YLR413W
YBR083W	YML046W
YBR083W	YOL105C
YBR083W	YOR247W
YBR083W	YOR315W
YBR083W	YPR158W-A
YBR240C	YER060W-A
YCR106W	YCR107W
YCR106W	YPR065W
YDL020C	YBL022C
YDL020C	YBL041W
YDL020C	YBL042C
YDL020C	YBR049C
YDL020C	YBR062C
YDL020C	YBR170C
YDL020C	YCR061W
YDL020C	YCR082W
YDL020C	YDL007W
YDL020C	YDL097C
YDL020C	YDL140C
YDL020C	YDL143W
YDL020C	YDL144C
YDL020C	YDR152W
YDL020C	YDR363W-A
YDL020C	YDR394W
YDL020C	YDR427W
YDL020C	YEL037C
YDL020C	YER012W
YDL020C	YER021W
YDL020C	YER094C
YDL020C	YFL024C
YDL020C	YFL044C
YDL020C	YFL055W
YDL020C	YFR003C
YDL020C	YFR004W
YDL020C	YFR010W
YDL020C	YFR024C-A
YDL020C	YFR050C
YDL020C	YFR052W
YDL020C	YGL010W
YDL020C	YGL011C
YDL020C	YGL012W
YDL020C	YGL013C
YDL020C	YGL047W
YDL020C	YGL048C
YDL020C	YGL117W
YDL020C	YGL173C
YDL020C	YGR048W
YDL020C	YGR135W
YDL020C	YGR142W
YDL020C	YGR253C
YDL020C	YGR254W
YDL020C	YHR200W
YDL020C	YIL075C
YDL020C	YJL001W
YDL020C	YKL015W
YDL020C	YKL016C
YDL020C	YKL145W
YDL020C	YKL210W
YDL020C	YLR199C
YDL020C	YLR259C
YDL020C	YLR287C-A
YDL020C	YLR421C
YDL020C	YML007W
YDL020C	YML008C
YDL020C	YML092C
YDL020C	YNL155W
YDL020C	YNL250W
YDL020C	YOL038W
YDL020C	YOR052C
YDL020C	YOR157C
YDL020C	YOR158W
YDL020C	YOR259C
YDL020C	YOR260W
YDL020C	YOR261C
YDL020C	YPR107C
YDL020C	YPR108W
YDL056W	YAR007C
YDL056W	YAR008W
YDL056W	YBL035C
YDL056W	YBR078W
YDL056W	YCL061C
YDL056W	YCR065W
YDL056W	YDL003W
YDL056W	YDL017W
YDL056W	YDL018C
YDL056W	YDL055C
YDL056W	YDL101C
YDL056W	YDL156W
YDL056W	YDL197C
YDL056W	YDR043C
YDL056W	YDR097C
YDL056W	YDR113C
YDL056W	YDR115W
YDL056W	YDR263C
YDL056W	YDR309C
YDL056W	YDR451C
YDL056W	YDR452W
YDL056W	YDR501W
YDL056W	YDR507C
YDL056W	YDR528W
YDL056W	YER004W
YDL056W	YER070W
YDL056W	YER071C
YDL056W	YER095W
YDL056W	YER111C
YDL056W	YER118C
YDL056W	YFL008W
YDL056W	YFR027W
YDL056W	YGR041W
YDL056W	YGR109C
YDL056W	YGR109W-B
YDL056W	YGR140W
YDL056W	YGR152C
YDL056W	YGR153W
YDL056W	YGR189C
YDL056W	YGR249W
YDL056W	YHR061C
YDL056W	YHR149C
YDL056W	YHR153C
YDL056W	YHR154W
YDL056W	YIL026C
YDL056W	YIL140W
YDL056W	YIL160C
YDL056W	YJL187C
YDL056W	YJL194W
YDL056W	YJL196C
YDL056W	YJR001W
YDL056W	YJR030C
YDL056W	YJR154W
YDL056W	YKL007W
YDL056W	YKL008C
YDL056W	YKL045W
YDL056W	YKL101W
YDL056W	YKL103C
YDL056W	YKL113C
YDL056W	YKR091W
YDL056W	YLR049C
YDL056W	YLR056W
YDL056W	YLR103C
YDL056W	YLR120C
YDL056W	YLR295C
YDL056W	YLR342W
YDL056W	YLR383W
YDL056W	YML012W
YDL056W	YML109W
YDL056W	YMR070W
YDL056W	YMR076C
YDL056W	YMR078C
YDL056W	YMR122W-A
YDL056W	YMR136W
YDL056W	YMR144W
YDL056W	YMR179W
YDL056W	YMR305C
YDL056W	YMR306W
YDL056W	YMR307W
YDL056W	YNL088W
YDL056W	YNL312W
YDL056W	YNR009W
YDL056W	YNR044W
YDL056W	YOL007C
YDL056W	YOL017W
YDL056W	YOL018C
YDL056W	YOL082W
YDL056W	YOR075W
YDL056W	YOR246C
YDL056W	YOR247W
YDL056W	YPL127C
YDL056W	YPL144W
YDL056W	YPL152W
YDL056W	YPL267W
YDL056W	YPR017C
YDL056W	YPR120C
YDL056W	YPR174C
YDL056W	YPR175W
YDL056W	YPR194C
YDL106C	YBR161W
YDL106C	YCL030C
YDL106C	YDL025C
YDL106C	YDL124W
YDL106C	YGR052W
YDL106C	YIL017C
YDL106C	YJL159W
YDL106C	YKL156W
YDL106C	YLL034C
YDL106C	YLR108C
YDL106C	YML123C
YDL106C	YMR195W
YDL106C	YNL036W
YDL106C	YOL084W
YDL106C	YOR145C
YDL106C	YPL135W
YDL106C	YPL137C
YDR043C	YAR029W
YDR043C	YBR067C
YDR043C	YBR085C-A
YDR043C	YBR158W
YDR043C	YDL049C
YDR043C	YDR403W
YDR043C	YEL038W
YDR043C	YEL039C
YDR043C	YEL040W
YDR043C	YER001W
YDR043C	YGR266W
YDR043C	YHL044W
YDR043C	YHR033W
YDR043C	YIL020C
YDR043C	YIL118W
YDR043C	YJL078C
YDR043C	YJL107C
YDR043C	YJL194W
YDR043C	YJL196C
YDR043C	YKL096W
YDR043C	YKR066C
YDR043C	YLR012C
YDR043C	YLR187W
YDR043C	YLR417W
YDR043C	YMR056C
YDR043C	YMR070W
YDR043C	YNL192W
YDR043C	YNL231C
YDR043C	YNR060W
YDR043C	YOL014W
YDR043C	YOL122C
YDR043C	YOR317W
YDR043C	YPL145C
YDR043C	YPL176C
YDR043C	YPR157W
YDR123C	YAL053W
YDR123C	YAL054C
YDR123C	YBL106C
YDR123C	YBR029C
YDR123C	YBR030W
YDR123C	YCR057C
YDR123C	YCR098C
YDR123C	YDL049C
YDR123C	YDR073W
YDR123C	YDR124W
YDR123C	YDR147W
YDR123C	YDR169C
YDR123C	YDR279W
YDR123C	YDR312W
YDR123C	YDR497C
YDR123C	YER033C
YDR123C	YER034W
YDR123C	YER043C
YDR123C	YER091C
YDR123C	YGR238C
YDR123C	YHL020C
YDR123C	YHR082C
YDR123C	YJL048C
YDR123C	YJL141C
YDR123C	YJL149W
YDR123C	YJL151C
YDR123C	YJL153C
YDR123C	YJR105W
YDR123C	YKL182W
YDR123C	YML075C
YDR123C	YNL044W
YDR123C	YNL080C
YDR123C	YNL103W
YDR123C	YNL104C
YDR123C	YNL169C
YDR123C	YNL175C
YDR123C	YNL178W
YDR123C	YNL306W
YDR123C	YNR016C
YDR123C	YOR032C
YDR123C	YOR234C
YDR123C	YPL231W
YDR123C	YPL254W
YDR146C	YBR071W
YDR146C	YBR083W
YDR146C	YBR157C
YDR146C	YBR158W
YDR146C	YDL117W
YDR146C	YDL119C
YDR146C	YDL179W
YDR146C	YDL227C
YDR146C	YDR397C
YDR146C	YGR086C
YDR146C	YIL009W
YDR146C	YKL163W
YDR146C	YKL164C
YDR146C	YKL185W
YDR146C	YLR079W
YDR146C	YLR194C
YDR146C	YLR300W
YDR146C	YNL078W
YDR146C	YNL192W
YDR146C	YNL327W
YDR146C	YNL328C
YDR146C	YPL157W
YDR146C	YPL158C
YDR216W	YPL147W
YDR259C	YCR107W
YDR259C	YDR258C
YDR259C	YJR094C
YDR259C	YOL155C
YDR310C	YBR041W
YDR310C	YBR076W
YDR310C	YBR084W
YDR310C	YBR148W
YDR310C	YBR180W
YDR310C	YCL048W
YDR310C	YDL186W
YDR310C	YDR042C
YDR310C	YDR281C
YDR310C	YDR311W
YDR310C	YDR322W
YDR310C	YDR402C
YDR310C	YDR403W
YDR310C	YDR522C
YDR310C	YER106W
YDR310C	YFL040W
YDR310C	YFR011C
YDR310C	YFR012W
YDR310C	YFR023W
YDR310C	YFR032C
YDR310C	YGL138C
YDR310C	YGL170C
YDR310C	YGR059W
YDR310C	YGR256W
YDR310C	YGR258C
YDR310C	YGR260W
YDR310C	YHR124W
YDR310C	YHR184W
YDR310C	YHR185C
YDR310C	YIR027C
YDR310C	YIR028W
YDR310C	YJL037W
YDR310C	YJL038C
YDR310C	YJL043W
YDR310C	YJR025C
YDR310C	YJR078W
YDR310C	YKL178C
YDR310C	YKR015C
YDR310C	YLL005C
YDR310C	YLR082C
YDR310C	YLR213C
YDR310C	YLR308W
YDR310C	YLR343W
YDR310C	YMR272C
YDR310C	YNL202W
YDR310C	YNL204C
YDR310C	YNL318C
YDR310C	YOL102C
YDR310C	YOR071C
YDR310C	YOR255W
YDR310C	YOR313C
YDR310C	YOR365C
YDR310C	YPL075W
YDR310C	YPL130W
YDR310C	YPL239W
YDR421W	YHR137W
YDR463W	YAL001C
YDR463W	YBR043C
YDR463W	YBR248C
YDR463W	YCL025C
YDR463W	YDL130W-A
YDR463W	YDL182W
YDR463W	YDL199C
YDR463W	YDR046C
YDR463W	YDR077W
YDR463W	YDR098C-B
YDR463W	YDR101C
YDR463W	YDR144C
YDR463W	YDR145W
YDR463W	YDR179W-A
YDR463W	YDR508C
YDR463W	YDR510W
YDR463W	YEL046C
YDR463W	YER048C
YDR463W	YGR055W
YDR463W	YJL198W
YDR463W	YJL200C
YDR463W	YJR013W
YDR463W	YJR109C
YDR463W	YKL161C
YDR463W	YKR004C
YDR463W	YLR094C
YDR463W	YLR430W
YDR463W	YOL007C
YDR463W	YOL057W
YDR463W	YOL058W
YDR463W	YOL117W
YDR463W	YOL119C
YDR463W	YOL125W
YDR463W	YOL126C
YDR463W	YOR221C
YDR463W	YOR222W
YDR463W	YOR273C
YDR463W	YOR274W
YDR463W	YPL059W
YDR463W	YPL217C
YDR463W	YPL253C
YDR463W	YPL265W
YDR463W	YPL273W
YDR520C	YBR137W
YDR520C	YER036C
YDR520C	YER037W
YDR520C	YER048W-A
YDR520C	YHR128W
YEL009C	YBR068C
YEL009C	YBR145W
YEL009C	YBR147W
YEL009C	YBR256C
YEL009C	YCL030C
YEL009C	YDL025C
YEL009C	YDL066W
YEL009C	YDL170W
YEL009C	YDL198C
YEL009C	YDR035W
YEL009C	YDR127W
YEL009C	YDR247W
YEL009C	YDR258C
YEL009C	YEL063C
YEL009C	YER052C
YEL009C	YER073W
YEL009C	YER175C
YEL009C	YFR053C
YEL009C	YGL009C
YEL009C	YGL026C
YEL009C	YGL059W
YEL009C	YGL125W
YEL009C	YGL180W
YEL009C	YGL184C
YEL009C	YGL255W
YEL009C	YGR052W
YEL009C	YGR065C
YEL009C	YGR067C
YEL009C	YGR161C
YEL009C	YHR018C
YEL009C	YHR029C
YEL009C	YHR071W
YEL009C	YIL019W
YEL009C	YIL056W
YEL009C	YIL079C
YEL009C	YIL116W
YEL009C	YIL117C
YEL009C	YIL119C
YEL009C	YIR017C
YEL009C	YIR034C
YEL009C	YJL088W
YEL009C	YJL130C
YEL009C	YJL200C
YEL009C	YJR025C
YEL009C	YJR104C
YEL009C	YJR109C
YEL009C	YJR154W
YEL009C	YKL103C
YEL009C	YLR267W
YEL009C	YMR062C
YEL009C	YMR095C
YEL009C	YMR096W
YEL009C	YMR136W
YEL009C	YMR195W
YEL009C	YNL104C
YEL009C	YNL239W
YEL009C	YNR069C
YEL009C	YOL058W
YEL009C	YOL117W
YEL009C	YOL119C
YEL009C	YOL140W
YEL009C	YOR108W
YEL009C	YOR130C
YEL009C	YOR222W
YEL009C	YOR303W
YEL009C	YPL058C
YEL009C	YPL111W
YEL009C	YPL135W
YEL009C	YPL250C
YEL009C	YPL264C
YEL009C	YPR144C
YEL009C	YPR145W
YER040W	YAL039C
YER040W	YAL040C
YER040W	YBL029C-A
YER040W	YBL029W
YER040W	YBL030C
YER040W	YBL041W
YER040W	YBL042C
YER040W	YBR043C
YER040W	YBR157C
YER040W	YCL054W
YER040W	YCR020C-A
YER040W	YCR095C
YER040W	YDL066W
YER040W	YDL067C
YER040W	YDL091C
YER040W	YDL130W-A
YER040W	YDL170W
YER040W	YDL171C
YER040W	YDL181W
YER040W	YDL215C
YER040W	YDL237W
YER040W	YDL238C
YER040W	YDR031W
YER040W	YDR090C
YER040W	YDR210W
YER040W	YDR372C
YER040W	YDR508C
YER040W	YEL071W
YER040W	YER002W
YER040W	YER045C
YER040W	YER048C
YER040W	YER070W
YER040W	YER088C
YER040W	YER175C
YER040W	YFL021W
YER040W	YGL006W
YER040W	YGL097W
YER040W	YGL134W
YER040W	YGL255W
YER040W	YGR019W
YER040W	YGR060W
YER040W	YGR183C
YER040W	YGR204W
YER040W	YGR234W
YER040W	YHL016C
YER040W	YHL028W
YER040W	YHR018C
YER040W	YHR029C
YER040W	YHR030C
YER040W	YIR005W
YER040W	YIR027C
YER040W	YIR032C
YER040W	YIR033W
YER040W	YJL133W
YER040W	YJL172W
YER040W	YJL173C
YER040W	YJR101W
YER040W	YJR109C
YER040W	YJR110W
YER040W	YJR148W
YER040W	YJR152W
YER040W	YKL062W
YER040W	YKL067W
YER040W	YKL072W
YER040W	YKL096W-A
YER040W	YKL101W
YER040W	YKL103C
YER040W	YKR038C
YER040W	YKR039W
YER040W	YKR092C
YER040W	YKR093W
YER040W	YLL015W
YER040W	YLR023C
YER040W	YMR016C
YER040W	YMR119W
YER040W	YNL141W
YER040W	YNR069C
YER040W	YOL058W
YER040W	YOL109W
YER040W	YOL117W
YER040W	YOL119C
YER040W	YOL159C
YER040W	YOR154W
YER040W	YOR230W
YER040W	YOR267C
YER040W	YOR313C
YER040W	YOR315W
YER040W	YOR375C
YER040W	YOR377W
YER040W	YPL056C
YER040W	YPL265W
YER040W	YPR035W
YER040W	YPR036W
YER040W	YPR144C
YER040W	YPR145W
YER040W	YPR194C
YER111C	YBL002W
YER111C	YBL003C
YER111C	YBL023C
YER111C	YBL029C-A
YER111C	YBL030C
YER111C	YBR070C
YER111C	YBR071W
YER111C	YBR077C
YER111C	YBR078W
YER111C	YBR112C
YER111C	YBR162C
YER111C	YCR065W
YER111C	YDL047W
YER111C	YDL055C
YER111C	YDL126C
YER111C	YDL211C
YER111C	YDL227C
YER111C	YDR224C
YER111C	YDR225W
YER111C	YDR261C
YER111C	YDR261W-B
YER111C	YDR441C
YER111C	YDR451C
YER111C	YDR501W
YER111C	YDR507C
YER111C	YDR508C
YER111C	YDR525W-A
YER111C	YDR528W
YER111C	YEL009C
YER111C	YER001W
YER111C	YER010C
YER111C	YER011W
YER111C	YER112W
YER111C	YER145C
YER111C	YER177W
YER111C	YFR017C
YER111C	YGL038C
YER111C	YGL096W
YER111C	YGL253W
YER111C	YGR014W
YER111C	YGR052W
YER111C	YGR109C
YER111C	YGR109W-A
YER111C	YGR109W-B
YER111C	YGR152C
YER111C	YGR153W
YER111C	YGR221C
YER111C	YHR061C
YER111C	YHR149C
YER111C	YHR205W
YER111C	YIL056W
YER111C	YIL123W
YER111C	YJL158C
YER111C	YJL185C
YER111C	YJL187C
YER111C	YJR048W
YER111C	YJR148W
YER111C	YKL007W
YER111C	YKL008C
YER111C	YKL043W
YER111C	YKL096W
YER111C	YKL096W-A
YER111C	YKL101W
YER111C	YKL103C
YER111C	YKR013W
YER111C	YKR042W
YER111C	YKR092C
YER111C	YKR093W
YER111C	YLR056W
YER111C	YLR084C
YER111C	YLR121C
YER111C	YLR254C
YER111C	YLR256W
YER111C	YLR303W
YER111C	YML027W
YER111C	YMR016C
YER111C	YMR136W
YER111C	YMR144W
YER111C	YMR179W
YER111C	YMR199W
YER111C	YMR305C
YER111C	YMR306W
YER111C	YNL231C
YER111C	YNL289W
YER111C	YNL298W
YER111C	YNL300W
YER111C	YNR017W
YER111C	YNR018W
YER111C	YOL012C
YER111C	YOL113W
YER111C	YOL114C
YER111C	YOR246C
YER111C	YOR247W
YER111C	YOR313C
YER111C	YOR315W
YER111C	YOR344C
YER111C	YPL016W
YER111C	YPL017C
YER111C	YPL082C
YER111C	YPL124W
YER111C	YPL127C
YER111C	YPL163C
YER111C	YPL267W
YER111C	YPR119W
YER111C	YPR148C
YER111C	YPR149W
YER161C	YBL091C-A
YER161C	YBR159W
YER161C	YCL005W
YER161C	YHR175W
YER161C	YIL169C
YER161C	YLR043C
YER161C	YLR057W
YER161C	YLR301W
YER161C	YLR354C
YER161C	YNL066W
YER161C	YOL041C
YER161C	YOL086W-A
YER161C	YOL154W
YER161C	YOL155C
YER161C	YOR236W
YER161C	YPL252C
YFL031W	YOL031C
YFR034C	YML123C
YGL035C	YCR082W
YGL035C	YDR441C
YGL035C	YEL069C
YGL035C	YJR056C
YGL035C	YOL156W
YGL131C	YAL039C
YGL131C	YBR138C
YGL131C	YBR145W
YGL131C	YCR091W
YGL131C	YHR138C
YGL131C	YJL093C
YGL131C	YLR149C
YGL131C	YNL182C
YGL131C	YPR104C
YGL131C	YPR158W
YGL237C	YBL099W
YGL237C	YBR039W
YGL237C	YBR243C
YGL237C	YCL054W
YGL237C	YDL067C
YGL237C	YDL170W
YGL237C	YDL181W
YGL237C	YDR088C
YGL237C	YDR210W
YGL237C	YDR377W
YGL237C	YDR529C
YGL237C	YEL024W
YGL237C	YEL047C
YGL237C	YER002W
YGL237C	YER174C
YGL237C	YFL022C
YGL237C	YFR033C
YGL237C	YGL187C
YGL237C	YGR084C
YGL237C	YGR183C
YGL237C	YGR233C
YGL237C	YGR234W
YGL237C	YGR243W
YGL237C	YHR001W-A
YGL237C	YHR051W
YGL237C	YIR005W
YGL237C	YJL011C
YGL237C	YJL148W
YGL237C	YJL192C
YGL237C	YJL198W
YGL237C	YJR077C
YGL237C	YLL015W
YGL237C	YLR220W
YGL237C	YLR368W
YGL237C	YMR119W
YGL237C	YMR256C
YGL237C	YNL050C
YGL237C	YOL077W-A
YGL237C	YOL154W
YGL237C	YOR375C
YGL237C	YOR377W
YGL237C	YPL019C
YGL237C	YPL207W
YGL237C	YPR145W
YGR044C	YDR528W
YGR044C	YER078C
YGR044C	YGL135W
YGR044C	YGR109W-A
YGR044C	YGR256W
YGR044C	YIL014C-A
YGR044C	YNR018W
YGR044C	YOL155C
YHL020C	YBR029C
YHL020C	YBR030W
YHL020C	YCR005C
YHL020C	YCR007C
YHL020C	YGR106C
YHL020C	YIL134W
YHL020C	YJL153C
YHL020C	YKL182W
YHL020C	YLR154C
YHL020C	YML070W
YHL020C	YNL130C
YHL020C	YNR054C
YHL020C	YOR271C
YHL020C	YOR272W
YHL020C	YPL111W
YHL020C	YPL112C
YHL020C	YPR001W
YHL020C	YPR028W
YHL020C	YPR072W
YHL020C	YPR120C
YHL020C	YPR159W
YHL020C	YPR171W
YHL027W	YEL071W
YHR084W	YBL016W
YHR084W	YBL086C
YHR084W	YBR040W
YHR084W	YBR083W
YHR084W	YBR156C
YHR084W	YBR158W
YHR084W	YCL027W
YHR084W	YCL055W
YHR084W	YDL089W
YHR084W	YDL090C
YHR084W	YDL240W
YHR084W	YDR085C
YHR084W	YDR098C-B
YHR084W	YDR099W
YHR084W	YDR249C
YHR084W	YDR261W-B
YHR084W	YDR309C
YHR084W	YER155C
YHR084W	YGL117W
YHR084W	YGL162W
YHR084W	YGR014W
YHR084W	YGR108W
YHR084W	YGR189C
YHR084W	YGR221C
YHR084W	YGR234W
YHR084W	YHR005C
YHR084W	YHR152W
YHR084W	YIL014C-A
YHR084W	YIL037C
YHR084W	YIL117C
YHR084W	YJL078C
YHR084W	YJL157C
YHR084W	YJR054W
YHR084W	YKL189W
YHR084W	YKR013W
YHR084W	YKR091W
YHR084W	YKR093W
YHR084W	YLR452C
YHR084W	YML046W
YHR084W	YML047C
YHR084W	YMR236W
YHR084W	YMR244C-A
YHR084W	YMR305C
YHR084W	YNL192W
YHR084W	YNL208W
YHR084W	YNR044W
YHR084W	YOR066W
YHR084W	YOR247W
YHR084W	YOR315W
YHR084W	YOR343W-B
YHR084W	YOR344C
YHR084W	YPL048W
YHR084W	YPL049C
YHR084W	YPL156C
YHR084W	YPL163C
YHR084W	YPR005C
YHR084W	YPR122W
YHR178W	YDL049C
YHR178W	YDL235C
YHR178W	YDR011W
YHR178W	YDR084C
YHR178W	YDR179W-A
YHR178W	YDR231C
YHR178W	YDR232W
YHR178W	YDR248C
YHR178W	YDR294C
YHR178W	YEL041W
YHR178W	YGR292W
YHR178W	YHR161C
YHR178W	YHR162W
YHR178W	YHR163W
YHR178W	YHR183W
YHR178W	YIL159W
YHR178W	YIL160C
YHR178W	YLR152C
YHR178W	YLR354C
YHR178W	YMR315W
YHR178W	YNL273W
YHR178W	YNL274C
YHR178W	YOR074C
YHR178W	YOR075W
YHR178W	YOR087W
YHR178W	YPL059W
YHR178W	YPL061W
YHR206W	YAL062W
YHR206W	YBL029C-A
YHR206W	YBR054W
YHR206W	YBR157C
YHR206W	YBR244W
YHR206W	YCR073C
YHR206W	YDL049C
YHR206W	YDL182W
YHR206W	YDL183C
YHR206W	YDR007W
YHR206W	YDR041W
YHR206W	YDR044W
YHR206W	YDR297W
YHR206W	YDR309C
YHR206W	YDR353W
YHR206W	YDR453C
YHR206W	YEL044W
YHR206W	YER001W
YHR206W	YER011W
YHR206W	YER075C
YHR206W	YER185W
YHR206W	YGL038C
YHR206W	YGR052W
YHR206W	YGR060W
YHR206W	YGR086C
YHR206W	YGR279C
YHR206W	YHR018C
YHR206W	YHR030C
YHR206W	YIL011W
YHR206W	YIL013C
YHR206W	YIL101C
YHR206W	YIL119C
YHR206W	YJL105W
YHR206W	YJL116C
YHR206W	YJL158C
YHR206W	YJR104C
YHR206W	YKL062W
YHR206W	YKL086W
YHR206W	YKL087C
YHR206W	YKR042W
YHR206W	YKR052C
YHR206W	YLL019C
YHR206W	YLR108C
YHR206W	YLR109W
YHR206W	YLR205C
YHR206W	YLR253W
YHR206W	YLR257W
YHR206W	YLR258W
YHR206W	YLR304C
YHR206W	YLR413W
YHR206W	YML028W
YHR206W	YML052W
YHR206W	YML100W
YHR206W	YMR145C
YHR206W	YMR173W
YHR206W	YMR199W
YHR206W	YMR305C
YHR206W	YNL173C
YHR206W	YNR018W
YHR206W	YOL014W
YHR206W	YOL052C-A
YHR206W	YOL058W
YHR206W	YOL059W
YHR206W	YOR226C
YHR206W	YPR009W
YHR206W	YPR013C
YHR206W	YPR065W
YHR206W	YPR149W
YIL036W	YAL062W
YIL036W	YAL063C
YIL036W	YBL018C
YIL036W	YBR013C
YIL036W	YBR110W
YIL036W	YBR168W
YIL036W	YBR229C
YIL036W	YCR095C
YIL036W	YDR028C
YIL036W	YDR045C
YIL036W	YDR067C
YIL036W	YDR068W
YIL036W	YDR282C
YIL036W	YDR372C
YIL036W	YDR373W
YIL036W	YDR393W
YIL036W	YGL250W
YIL036W	YGL251C
YIL036W	YGR150C
YIL036W	YGR271C-A
YIL036W	YHR171W
YIL036W	YIL134W
YIL036W	YIL135C
YIL036W	YJR088C
YIL036W	YJR089W
YIL036W	YKL077W
YIL036W	YLR022C
YIL036W	YMR065W
YIL036W	YMR125W
YIL036W	YMR258C
YIL036W	YMR284W
YIL036W	YMR293C
YIL036W	YMR294W
YIL036W	YNL001W
YIL036W	YNL002C
YIL036W	YOL115W
YIL036W	YOR094W
YIL036W	YOR234C
YIL036W	YPR081C
YIL131C	YBR139W
YIL131C	YBR158W
YIL131C	YCL027W
YIL131C	YCL064C
YIL131C	YCR075C
YIL131C	YDR113C
YIL131C	YDR115W
YIL131C	YDR179C
YIL131C	YDR179W-A
YIL131C	YDR263C
YIL131C	YDR325W
YIL131C	YDR488C
YIL131C	YDR501W
YIL131C	YER070W
YIL131C	YER124C
YIL131C	YER125W
YIL131C	YGL028C
YIL131C	YGL255W
YIL131C	YGL256W
YIL131C	YGR092W
YIL131C	YGR099W
YIL131C	YGR108W
YIL131C	YGR188C
YIL131C	YHR084W
YIL131C	YHR094C
YIL131C	YHR143W
YIL131C	YJR112W
YIL131C	YKL069W
YIL131C	YKR054C
YIL131C	YLR209C
YIL131C	YLR210W
YIL131C	YLR286C
YIL131C	YLR300W
YIL131C	YMR078C
YIL131C	YMR144W
YIL131C	YMR198W
YIL131C	YMR215W
YIL131C	YNL104C
YIL131C	YPL116W
YIL131C	YPL177C
YIL131C	YPL227C
YIR018W	YCR107W
YJL056C	YGL255W
YJL056C	YJL055W
YJL056C	YLR130C
YJL089W	YER065C
YJR060W	YAL012W
YJR060W	YAL026C
YJR060W	YAL053W
YJR060W	YAL054C
YJR060W	YBR015C
YJR060W	YBR039W
YJR060W	YBR049C
YJR060W	YBR143C
YJR060W	YBR145W
YJR060W	YBR249C
YJR060W	YBR250W
YJR060W	YBR255C-A
YJR060W	YCR087C-A
YJR060W	YCR088W
YJR060W	YCR092C
YJR060W	YCR093W
YJR060W	YDL006W
YJR060W	YDL020C
YJR060W	YDL051W
YJR060W	YDL059C
YJR060W	YDL074C
YJR060W	YDL095W
YJR060W	YDL097C
YJR060W	YDR054C
YJR060W	YDR055W
YJR060W	YDR141C
YJR060W	YDR267C
YJR060W	YDR297W
YJR060W	YDR381C-A
YJR060W	YDR382W
YJR060W	YDR503C
YJR060W	YDR530C
YJR060W	YDR531W
YJR060W	YEL024W
YJR060W	YEL043W
YJR060W	YEL046C
YJR060W	YER001W
YJR060W	YER043C
YJR060W	YER045C
YJR060W	YER053C
YJR060W	YER053C-A
YJR060W	YER055C
YJR060W	YER060W-A
YJR060W	YER062C
YJR060W	YER063W
YJR060W	YER071C
YJR060W	YER074W-A
YJR060W	YER094C
YJR060W	YER099C
YJR060W	YER107C
YJR060W	YER114C
YJR060W	YER124C
YJR060W	YER177W
YJR060W	YFL018C
YJR060W	YFL023W
YJR060W	YFL024C
YJR060W	YFL031W
YJR060W	YFL033C
YJR060W	YFR030W
YJR060W	YFR049W
YJR060W	YGR032W
YJR060W	YGR052W
YJR060W	YGR060W
YJR060W	YGR110W
YJR060W	YGR154C
YJR060W	YGR155W
YJR060W	YGR200C
YJR060W	YGR204W
YJR060W	YGR223C
YJR060W	YGR230W
YJR060W	YGR234W
YJR060W	YHR001W-A
YJR060W	YHR033W
YJR060W	YHR042W
YJR060W	YHR083W
YJR060W	YHR089C
YJR060W	YHR099W
YJR060W	YHR112C
YJR060W	YHR113W
YJR060W	YHR136C
YJR060W	YHR137W
YJR060W	YIL033C
YJR060W	YIL088C
YJR060W	YIL118W
YJR060W	YIL119C
YJR060W	YIL126W
YJR060W	YIL127C
YJR060W	YIR006C
YJR060W	YIR007W
YJR060W	YIR017C
YJR060W	YJL012C
YJR060W	YJL060W
YJR060W	YJL101C
YJR060W	YJL109C
YJR060W	YJL116C
YJR060W	YJL149W
YJR060W	YJL158C
YJR060W	YJL166W
YJR060W	YJL167W
YJR060W	YJL168C
YJR060W	YJL186W
YJR060W	YJL187C
YJR060W	YJL209W
YJR060W	YJR009C
YJR060W	YJR010W
YJR060W	YJR095W
YJR060W	YJR137C
YJR060W	YJR138W
YJR060W	YJR147W
YJR060W	YKL016C
YJR060W	YKL139W
YJR060W	YKL191W
YJR060W	YKL192C
YJR060W	YKR072C
YJR060W	YKR074W
YJR060W	YLL055W
YJR060W	YLR081W
YJR060W	YLR092W
YJR060W	YLR149C
YJR060W	YLR409C
YJR060W	YLR410W
YJR060W	YML017W
YJR060W	YML119W
YJR060W	YML120C
YJR060W	YML123C
YJR060W	YMR195W
YJR060W	YMR196W
YJR060W	YMR197C
YJR060W	YMR198W
YJR060W	YMR217W
YJR060W	YMR301C
YJR060W	YMR308C
YJR060W	YNL036W
YJR060W	YNL037C
YJR060W	YNL063W
YJR060W	YNL095C
YJR060W	YNL103W
YJR060W	YNL104C
YJR060W	YNL220W
YJR060W	YNL259C
YJR060W	YNL260C
YJR060W	YNL277W
YJR060W	YNL283C
YJR060W	YNR013C
YJR060W	YNR014W
YJR060W	YNR051C
YJR060W	YOL011W
YJR060W	YOL064C
YJR060W	YOL101C
YJR060W	YOR064C
YJR060W	YOR065W
YJR060W	YOR098C
YJR060W	YOR099W
YJR060W	YOR288C
YJR060W	YOR289W
YJR060W	YOR299W
YJR060W	YOR302W
YJR060W	YOR303W
YJR060W	YOR327C
YJR060W	YOR367W
YJR060W	YOR375C
YJR060W	YOR377W
YJR060W	YPL018W
YJR060W	YPL019C
YJR060W	YPL170W
YJR060W	YPL171C
YJR060W	YPL206C
YJR060W	YPL235W
YJR060W	YPL236C
YJR060W	YPL250C
YJR060W	YPL254W
YJR060W	YPR072W
YJR060W	YPR194C
YJR094C	YBR016W
YKL015W	YHR037W
YKL015W	YOR306C
YKL020C	YER044C-A
YKL020C	YHR015W
YKL020C	YJR011C
YKL020C	YKL067W
YKL020C	YOL161C
YKL032C	YDR441C
YKL032C	YIL118W
YKL032C	YIL119C
YKL032C	YKR075C
YKL032C	YKR076W
YKL038W	YER028C
YKL038W	YHR094C
YKL062W	YEL073C
YKL062W	YKL051W
YKL062W	YML100W
YKL062W	YMR119W
YKL062W	YOR236W
YKL062W	YPL017C
YKL109W	YBL030C
YKL109W	YBL045C
YKL109W	YBL099W
YKL109W	YBR039W
YKL109W	YDL004W
YKL109W	YDL067C
YKL109W	YDL181W
YKL109W	YDR148C
YKL109W	YDR298C
YKL109W	YDR322C-A
YKL109W	YDR377W
YKL109W	YDR529C
YKL109W	YEL001C
YKL109W	YEL024W
YKL109W	YEL073C
YKL109W	YFR033C
YKL109W	YGL187C
YKL109W	YGL191W
YKL109W	YGR183C
YKL109W	YHR001W-A
YKL109W	YHR051W
YKL109W	YKL016C
YKL109W	YKL148C
YKL109W	YLR038C
YKL109W	YLR295C
YKL109W	YLR395C
YKL109W	YMR256C
YKL109W	YNL052W
YKL109W	YOL077W-A
YKL109W	YOR064C
YKL109W	YOR065W
YKL109W	YOR187W
YKL109W	YPR010C
YKL109W	YPR020W
YKL185W	YAL039C
YKL185W	YDR055W
YKL185W	YIL122W
YKL185W	YJL159W
YKL185W	YJL194W
YKL185W	YKL163W
YKL185W	YKL186C
YKL185W	YMR122W-A
YKL185W	YNL300W
YKR034W	YLR363W-A
YKR099W	YAL044C
YKR099W	YAL060W
YKR099W	YCL030C
YKR099W	YDR019C
YKR099W	YDR408C
YKR099W	YER061C
YKR099W	YER091C
YKR099W	YGL184C
YKR099W	YGL186C
YKR099W	YGL234W
YKR099W	YGL236C
YKR099W	YGR061C
YKR099W	YGR204W
YKR099W	YKL218C
YKR099W	YKR080W
YKR099W	YLR058C
YKR099W	YLR359W
YKR099W	YMR120C
YKR099W	YMR188C
YKR099W	YMR189W
YKR099W	YMR244W
YKR099W	YMR300C
YKR099W	YNL220W
YKR099W	YOR128C
YKR099W	YPL018W
YKR099W	YPL019C
YLR098C	YCL063W
YLR098C	YCL064C
YLR131C	YAL040C
YLR131C	YBL023C
YLR131C	YBR158W
YLR131C	YBR162C
YLR131C	YDL055C
YLR131C	YDL127W
YLR131C	YDR155C
YLR131C	YER081W
YLR131C	YER088C
YLR131C	YER124C
YLR131C	YER125W
YLR131C	YER177W
YLR131C	YFL021W
YLR131C	YGL008C
YLR131C	YGL028C
YLR131C	YGL229C
YLR131C	YGR041W
YLR131C	YHR143W
YLR131C	YHR194W
YLR131C	YIL009C-A
YLR131C	YIL009W
YLR131C	YJL078C
YLR131C	YJR147W
YLR131C	YJR148W
YLR131C	YKL150W
YLR131C	YKL151C
YLR131C	YLR286C
YLR131C	YML004C
YLR131C	YML008C
YLR131C	YML082W
YLR131C	YMR251W-A
YLR131C	YMR262W
YLR131C	YNL078W
YLR131C	YNL327W
YLR131C	YNR018W
YLR131C	YPR105C
YLR131C	YPR106W
YLR176C	YDL129W
YLR176C	YGR180C
YLR176C	YIL066C
YLR176C	YJL134W
YLR176C	YLR286C
YLR176C	YMR177W
YLR176C	YMR279C
YLR176C	YOR280C
YLR182W	YBL029C-A
YLR182W	YBL029W
YLR182W	YBL030C
YLR182W	YBR070C
YLR182W	YBR071W
YLR182W	YBR077C
YLR182W	YCL054W
YLR182W	YCR065W
YLR182W	YDL003W
YLR182W	YDL017W
YLR182W	YDL018C
YLR182W	YDL055C
YLR182W	YDL101C
YLR182W	YDL127W
YLR182W	YDL211C
YLR182W	YDL227C
YLR182W	YDR113C
YLR182W	YDR115W
YLR182W	YDR224C
YLR182W	YDR225W
YLR182W	YDR263C
YLR182W	YDR309C
YLR182W	YDR324C
YLR182W	YDR451C
YLR182W	YDR501W
YLR182W	YDR524C
YLR182W	YDR525W-A
YLR182W	YDR527W
YLR182W	YDR528W
YLR182W	YEL001C
YLR182W	YEL040W
YLR182W	YER001W
YLR182W	YER070W
YLR182W	YER079W
YLR182W	YER094C
YLR182W	YER095W
YLR182W	YER111C
YLR182W	YER112W
YLR182W	YGL038C
YLR182W	YGL178W
YLR182W	YGL179C
YLR182W	YGL253W
YLR182W	YGR109C
YLR182W	YGR109W-A
YLR182W	YGR109W-B
YLR182W	YGR153W
YLR182W	YGR180C
YLR182W	YGR189C
YLR182W	YGR221C
YLR182W	YGR279C
YLR182W	YHL029C
YLR182W	YHR149C
YLR182W	YHR150W
YLR182W	YHR152W
YLR182W	YIL026C
YLR182W	YIL056W
YLR182W	YIL123W
YLR182W	YJL045W
YLR182W	YJL092W
YLR182W	YJL093C
YLR182W	YJL115W
YLR182W	YJL116C
YLR182W	YJL184W
YLR182W	YJL194W
YLR182W	YJL196C
YLR182W	YJR054W
YLR182W	YJR091C
YLR182W	YJR145C
YLR182W	YJR147W
YLR182W	YKL007W
YLR182W	YKL008C
YLR182W	YKL043W
YLR182W	YKL067W
YLR182W	YKL096W
YLR182W	YKL096W-A
YLR182W	YKL112W
YLR182W	YKL113C
YLR182W	YKR013W
YLR182W	YKR042W
YLR182W	YLR055C
YLR182W	YLR056W
YLR182W	YLR103C
YLR182W	YLR332W
YLR182W	YLR342W
YLR182W	YLR438C-A
YLR182W	YLR438W
YLR182W	YML027W
YLR182W	YML100W
YLR182W	YML101C
YLR182W	YMR016C
YLR182W	YMR070W
YLR182W	YMR076C
YLR182W	YMR121C
YLR182W	YMR122W-A
YLR182W	YMR135C
YLR182W	YMR136W
YLR182W	YMR144W
YLR182W	YMR165C
YLR182W	YMR179W
YLR182W	YMR199W
YLR182W	YMR215W
YLR182W	YMR305C
YLR182W	YMR306W
YLR182W	YNL231C
YLR182W	YNL273W
YLR182W	YNL274C
YLR182W	YNL289W
YLR182W	YNL298W
YLR182W	YNL300W
YLR182W	YNR009W
YLR182W	YNR018W
YLR182W	YNR044W
YLR182W	YOL113W
YLR182W	YOR074C
YLR182W	YOR075W
YLR182W	YOR236W
YLR182W	YOR246C
YLR182W	YOR313C
YLR182W	YOR315W
YLR182W	YOR344C
YLR182W	YOR372C
YLR182W	YOR373W
YLR182W	YPL024W
YLR182W	YPL126W
YLR182W	YPL127C
YLR182W	YPL163C
YLR182W	YPL255W
YLR182W	YPL256C
YLR182W	YPR009W
YLR182W	YPR119W
YLR182W	YPR120C
YLR182W	YPR121W
YLR182W	YPR159W
YLR256W	YDL018C
YLR256W	YDR527W
YLR256W	YEL038W
YLR256W	YER044C
YLR256W	YER048C
YLR256W	YER053C-A
YLR256W	YGR035C
YLR256W	YGR234W
YLR256W	YHR007C
YLR256W	YJL048C
YLR256W	YJR047C
YLR256W	YJR048W
YLR256W	YKR046C
YLR256W	YLR108C
YLR256W	YLR154C
YLR256W	YLR254C
YLR256W	YML008C
YLR256W	YML036W
YLR256W	YML054C
YLR256W	YML075C
YLR256W	YML126C
YLR256W	YMR201C
YLR256W	YNL111C
YLR256W	YNR054C
YLR256W	YOL109W
YLR256W	YOR065W
YLR256W	YOR356W
YLR256W	YPL116W
YLR256W	YPL218W
YLR403W	YAL003W
YLR403W	YAL062W
YLR403W	YAL063C
YLR403W	YBR085W
YLR403W	YBR188C
YLR403W	YDL076C
YLR403W	YDL083C
YLR403W	YDL130W
YLR403W	YDL133W
YLR403W	YDR064W
YLR403W	YDR077W
YLR403W	YDR324C
YLR403W	YDR325W
YLR403W	YDR447C
YLR403W	YDR470C
YLR403W	YDR471W
YLR403W	YER116C
YLR403W	YFR053C
YLR403W	YGL103W
YLR403W	YGL104C
YLR403W	YGL196W
YLR403W	YGR027C
YLR403W	YGR117C
YLR403W	YHR021C
YLR403W	YHR021W-A
YLR403W	YHR047C
YLR403W	YHR048W
YLR403W	YHR139C
YLR403W	YHR140W
YLR403W	YHR141C
YLR403W	YHR142W
YLR403W	YJL136C
YLR403W	YJR154W
YLR403W	YKL100C
YLR403W	YKL220C
YLR403W	YLR042C
YLR403W	YLR061W
YLR403W	YLR125W
YLR403W	YLR448W
YLR403W	YML024W
YLR403W	YML064C
YLR403W	YML073C
YLR403W	YMR144W
YLR403W	YMR283C
YLR403W	YNL069C
YLR403W	YNL096C
YLR403W	YNL162W-A
YLR403W	YNL163C
YLR403W	YNL164C
YLR403W	YNL288W
YLR403W	YNL302C
YLR403W	YOL121C
YLR403W	YOR032C
YLR403W	YOR070C
YLR403W	YOR234C
YLR403W	YOR312C
YLR403W	YOR313C
YLR403W	YOR315W
YLR403W	YPL029W
YLR403W	YPL090C
YLR403W	YPR043W
YLR403W	YPR120C
YLR403W	YPR121W
YLR451W	YBL029C-A
YLR451W	YBL029W
YLR451W	YBR068C
YLR451W	YGL009C
YLR451W	YHR208W
YLR451W	YJR016C
YLR451W	YKL120W
YLR451W	YNL104C
YLR451W	YOR108W
YML007W	YCR102C
YML007W	YDL182W
YML007W	YDR011W
YML007W	YDR533C
YML007W	YGR060W
YML007W	YGR209C
YML007W	YHL040C
YML007W	YJL101C
YML007W	YJR104C
YML007W	YJR109C
YML007W	YJR122W
YML007W	YKL086W
YML007W	YKR052C
YML007W	YKR071C
YML007W	YLL058W
YML007W	YLR108C
YML007W	YLR109W
YML007W	YLR460C
YML007W	YML116W
YML007W	YML131W
YML007W	YMR318C
YML007W	YNL134C
YML007W	YOL119C
YML027W	YDR191W
YML027W	YEL032W
YML027W	YGR092W
YML027W	YLR273C
YML027W	YLR274W
YML051W	YBR019C
YML051W	YBR020W
YML099C	YER069W
YML099C	YFL023W
YML099C	YHR179W
YML099C	YJL088W
YML099C	YOL058W
YML099C	YOL140W
YML099C	YOR302W
YML099C	YOR303W
YMR016C	YAL061W
YMR016C	YBL029C-A
YMR016C	YBL029W
YMR016C	YBL043W
YMR016C	YBR066C
YMR016C	YBR092C
YMR016C	YBR114W
YMR016C	YDL048C
YMR016C	YDR077W
YMR016C	YDR216W
YMR016C	YDR441C
YMR016C	YDR492W
YMR016C	YEL040W
YMR016C	YEL066W
YMR016C	YER001W
YMR016C	YER011W
YMR016C	YER033C
YMR016C	YER034W
YMR016C	YER044C
YMR016C	YER045C
YMR016C	YER145C
YMR016C	YER158C
YMR016C	YFR053C
YMR016C	YFR055W
YMR016C	YGL008C
YMR016C	YGL158W
YMR016C	YGR052W
YMR016C	YGR060W
YMR016C	YGR086C
YMR016C	YGR108W
YMR016C	YGR238C
YMR016C	YGR249W
YMR016C	YGR279C
YMR016C	YIL099W
YMR016C	YIL101C
YMR016C	YIL119C
YMR016C	YIL122W
YMR016C	YJL079C
YMR016C	YJL105W
YMR016C	YJL138C
YMR016C	YJL217W
YMR016C	YJR127C
YMR016C	YKL043W
YMR016C	YKL062W
YMR016C	YLR300W
YMR016C	YLR342W
YMR016C	YMR006C
YMR016C	YMR017W
YMR016C	YMR056C
YMR016C	YMR058W
YMR016C	YMR122W-A
YMR016C	YMR136W
YMR016C	YMR199W
YMR016C	YMR319C
YMR016C	YNL180C
YMR016C	YOR028C
YMR016C	YOR152C
YMR016C	YOR153W
YMR016C	YOR178C
YMR016C	YOR317W
YMR016C	YPL024W
YMR016C	YPL026C
YMR016C	YPL177C
YMR016C	YPL230W
YMR016C	YPL256C
YMR016C	YPR013C
YMR019W	YBR046C
YMR019W	YBR047W
YMR019W	YBR222C
YMR019W	YEL020C
YMR019W	YIL166C
YMR019W	YPR128C
YMR021C	YCR024C-A
YMR021C	YDR171W
YMR021C	YER001W
YMR021C	YER145C
YMR021C	YIL117C
YMR021C	YKL062W
YMR021C	YNL034W
YMR021C	YOL154W
YMR021C	YPL177C
YMR021C	YPR124W
YMR037C	YAL060W
YMR037C	YBR085C-A
YMR037C	YBR151W
YMR037C	YCL021W-A
YMR037C	YCL039W
YMR037C	YDR098C-B
YMR037C	YDR171W
YMR037C	YDR177W
YMR037C	YDR261C
YMR037C	YDR261W-B
YMR037C	YDR453C
YMR037C	YEL011W
YMR037C	YEL040W
YMR037C	YER053C
YMR037C	YER177W
YMR037C	YFR053C
YMR037C	YGR008C
YMR037C	YGR052W
YMR037C	YGR086C
YMR037C	YGR088W
YMR037C	YGR256W
YMR037C	YHR047C
YMR037C	YIL056W
YMR037C	YIL101C
YMR037C	YIL169C
YMR037C	YJL048C
YMR037C	YKL085W
YMR037C	YKL096W
YMR037C	YKL103C
YMR037C	YKR066C
YMR037C	YLR257W
YMR037C	YLR258W
YMR037C	YLR413W
YMR037C	YML028W
YMR037C	YML100W
YMR037C	YMR090W
YMR037C	YMR173W
YMR037C	YMR175W
YMR037C	YMR251W-A
YMR037C	YMR315W
YMR037C	YNL007C
YMR037C	YNL134C
YMR037C	YNL160W
YMR037C	YOL052C-A
YMR037C	YOL155C
YMR037C	YOR273C
YMR037C	YOR350C
YMR037C	YPL137C
YMR037C	YPR149W
YMR037C	YPR160W
YMR042W	YER069W
YMR042W	YFL023W
YMR042W	YFR032C-A
YMR042W	YHR179W
YMR042W	YJL088W
YMR042W	YKL060C
YMR042W	YKR076W
YMR042W	YML098W
YMR042W	YML099C
YMR042W	YOL140W
YMR042W	YOR302W
YMR042W	YOR303W
YMR042W	YOR317W
YMR042W	YPL123C
YMR042W	YPL265W
YMR070W	YAL060W
YMR070W	YBR185C
YMR070W	YCR100C
YMR070W	YDR349C
YMR070W	YDR440W
YMR070W	YDR441C
YMR070W	YEL060C
YMR070W	YER045C
YMR070W	YER149C
YMR070W	YFL020C
YMR070W	YFR055W
YMR070W	YGL255W
YMR070W	YGR249W
YMR070W	YHL028W
YMR070W	YHR005C-A
YMR070W	YHR047C
YMR070W	YIL099W
YMR070W	YIL101C
YMR070W	YJL011C
YMR070W	YJL037W
YMR070W	YJL200C
YMR070W	YKL001C
YMR070W	YKL071W
YMR070W	YKR003W
YMR070W	YKR042W
YMR070W	YLR303W
YMR070W	YML007W
YMR070W	YML008C
YMR070W	YMR061W
YMR070W	YNL173C
YMR070W	YOL109W
YMR070W	YOL164W
YMR070W	YOL165C
YMR070W	YOR315W
YMR070W	YOR342C
YMR070W	YPL135W
YMR070W	YPR065W
YMR070W	YPR149W
YMR070W	YPR154W
YMR070W	YPR184W
YNL068C	YAL024C
YNL068C	YAL054C
YNL068C	YAR018C
YNL068C	YBR049C
YNL068C	YBR053C
YNL068C	YBR054W
YNL068C	YBR077C
YNL068C	YBR078W
YNL068C	YBR092C
YNL068C	YBR138C
YNL068C	YBR139W
YNL068C	YCL054W
YNL068C	YCL063W
YNL068C	YCR075C
YNL068C	YDL101C
YNL068C	YDR032C
YNL068C	YDR033W
YNL068C	YDR077W
YNL068C	YDR113C
YNL068C	YDR325W
YNL068C	YDR500C
YNL068C	YEL007W
YNL068C	YEL017W
YNL068C	YEL071W
YNL068C	YER070W
YNL068C	YER095W
YNL068C	YFL022C
YNL068C	YFR003C
YNL068C	YGL021W
YNL068C	YGL028C
YNL068C	YGL256W
YNL068C	YGR086C
YNL068C	YGR098C
YNL068C	YGR099W
YNL068C	YGR108W
YNL068C	YGR143W
YNL068C	YHL024W
YNL068C	YHL028W
YNL068C	YHR031C
YNL068C	YHR152W
YNL068C	YIL131C
YNL068C	YIL169C
YNL068C	YJL036W
YNL068C	YJL078C
YNL068C	YKL008C
YNL068C	YKL069W
YNL068C	YKR031C
YNL068C	YKR092C
YNL068C	YLR142W
YNL068C	YLR190W
YNL068C	YLR209C
YNL068C	YLR210W
YNL068C	YLR360W
YNL068C	YLR399C
YNL068C	YML052W
YNL068C	YML064C
YNL068C	YML124C
YNL068C	YMR117C
YNL068C	YMR144W
YNL068C	YMR163C
YNL068C	YMR180C
YNL068C	YMR183C
YNL068C	YMR184W
YNL068C	YMR198W
YNL068C	YNL056W
YNL068C	YNL058C
YNL068C	YNL091W
YNL068C	YOR230W
YNL068C	YOR233W
YNL068C	YOR246C
YNL068C	YOR247W
YNL068C	YOR315W
YNL068C	YOR372C
YNL068C	YOR373W
YNL068C	YPL015C
YNL068C	YPL024W
YNL068C	YPL116W
YNL068C	YPL141C
YNL068C	YPL242C
YNL068C	YPR033C
YNL068C	YPR119W
YNL068C	YPR149W
YNL068C	YPR157W
YNL167C	YBL030C
YNL167C	YDR077W
YNL167C	YDR534C
YNL167C	YEL066W
YNL167C	YER075C
YNL167C	YGL006W
YNL167C	YGR243W
YNL167C	YGR249W
YNL167C	YHR033W
YNL167C	YHR049W
YNL167C	YHR096C
YNL167C	YJL106W
YNL167C	YJL107C
YNL167C	YKL096W
YNL167C	YMR136W
YNL167C	YOR349W
YNL167C	YPR005C
YNL199C	YAL038W
YNL199C	YAL039C
YNL199C	YBR145W
YNL199C	YBR196C
YNL199C	YDL049C
YNL199C	YDR042C
YNL199C	YDR050C
YNL199C	YDR508C
YNL199C	YDR510W
YNL199C	YDR528W
YNL199C	YEL044W
YNL199C	YEL055C
YNL199C	YER091C
YNL199C	YER177W
YNL199C	YGL062W
YNL199C	YGL134W
YNL199C	YGL255W
YNL199C	YGR060W
YNL199C	YGR078C
YNL199C	YHL015W
YNL199C	YHL016C
YNL199C	YHR174W
YNL199C	YJL004C
YNL199C	YJL148W
YNL199C	YJL194W
YNL199C	YJL196C
YNL199C	YJL198W
YNL199C	YJR009C
YNL199C	YJR010W
[truncated: 404 more rows]
